# Supplementary material for: Using micro-solvation and generalized coordination numbers to estimate the solvation energies of adsorbed hydroxyl on metal nanoparticles
Source: Royal Society of Chemistry journal article supplement (doi:10.1039/d2cp04785c), 2023-01-01
Supplement: d2cp04785c1.pdf [file d2cp04785c1.pdf]

## Supporting Information for:

### Trends in adsorbed hydroxyl – water interactions on late transition metal nanoparticles

Selwyn Hanselman,<sup>1</sup> Marc T. M. Koper,<sup>1\*</sup> Federico Calle-Vallejo<sup>2,3,4,\*</sup>

<sup>1</sup> *Leiden Institute of Chemistry, Leiden University, PO Box 9502, Leiden 2300 RA, The Netherlands.*

<sup>2</sup> *Nano–Bio Spectroscopy Group and European Theoretical Spectroscopy Facility (ETSF), Department of Polymers and Advanced Materials: Physics, Chemistry and Technology, University of the Basque Country UPV/EHU, Av. Tolosa 72, 20018 San Sebastián, Spain.*

<sup>3</sup> *IKERBASQUE, Basque Foundation for Science, Plaza de Euskadi 5, 48009 Bilbao, Spain.*

<sup>4</sup> *Department of Materials Science and Chemical Physics & Institute of Theoretical and Computational Chemistry (IQTC), University de Barcelona, Martí i Franquès 1, 08028 Barcelona, Spain.*

\*Corresponding authors: [m.koper@lic.leidenuniv.nl](mailto:m.koper@lic.leidenuniv.nl), [federico.calle@ehu.es](mailto:federico.calle@ehu.es)

#### Table of contents

|                                                                                                    |           |
|----------------------------------------------------------------------------------------------------|-----------|
| <b>S.1. Construction of nanoparticles and micro-solvated *OH and H<sub>2</sub>O configurations</b> | <b>2</b>  |
| <b>S.2. Computational details</b>                                                                  | <b>4</b>  |
| <b>S.3. Thermodynamics</b>                                                                         | <b>6</b>  |
| <b>S.4. Formation energy thermodynamics and statistics</b>                                         | <b>8</b>  |
| <b>S.5. Statistical treatment of bivariate normal distributions</b>                                | <b>16</b> |
| <b>S.6. Solvation thermodynamics and statistics</b>                                                | <b>18</b> |
| <b>S.7. Bond lengths and statistics</b>                                                            | <b>21</b> |
| <b>S.8. Excerpts from selected tables</b>                                                          | <b>22</b> |
| <b>S.9. Water bilayer on Au(111)</b>                                                               | <b>25</b> |
| <b>References</b>                                                                                  | <b>25</b> |

### **S.1. Construction of nanoparticles and micro-solvated \*OH and H<sub>2</sub>O configurations**

The truncated octahedral nanoparticles for each metal were created by relaxing the converged coordinates for Pt nanoparticles found in previous works.<sup>1</sup> Micro-solvated \*OH configurations, more specifically the hydrogen and oxygen atom positions, were taken from the equivalent configurations relaxed in previous works.<sup>1</sup> The OH moiety and water molecules in each configuration were adsorbed onto nanoparticle atoms, equivalent to those on the Pt nanoparticle based on the local coordination environments within the nanoparticle. From these \*OH structures, corresponding H<sub>2</sub>O configurations are generated by replacing the OH moiety by a central H<sub>2</sub>O molecule, moving and rotating this H<sub>2</sub>O molecule away from the surface, and adjusting the orientation and position of the remainder three water molecules to obtain a roughly tetrahedral coordination of the central H<sub>2</sub>O oxygen atom. Ultimately, the central water molecule should form hydrogen bonds with each of the three peripheral water molecules, as shown in Figure 1 in the main text.

Additionally, corresponding \*OH and H<sub>2</sub>O configurations should agree on the features illustrated in Figure S.1: the orientation of the non-binding H atoms of the surface-bound solvent water molecules relative to the mirror plane intersecting the surface-bound solvent and solute adsorption site atom; the (downwards) orientation of one H atom on the non-surface bound water molecule; and (for non-mirror symmetric configurations) the orientation of the second H atom on the non-surface bound water molecule relative to the plane containing the solute O atom, the non-surface bound water molecule O atom and the solute adsorption site.

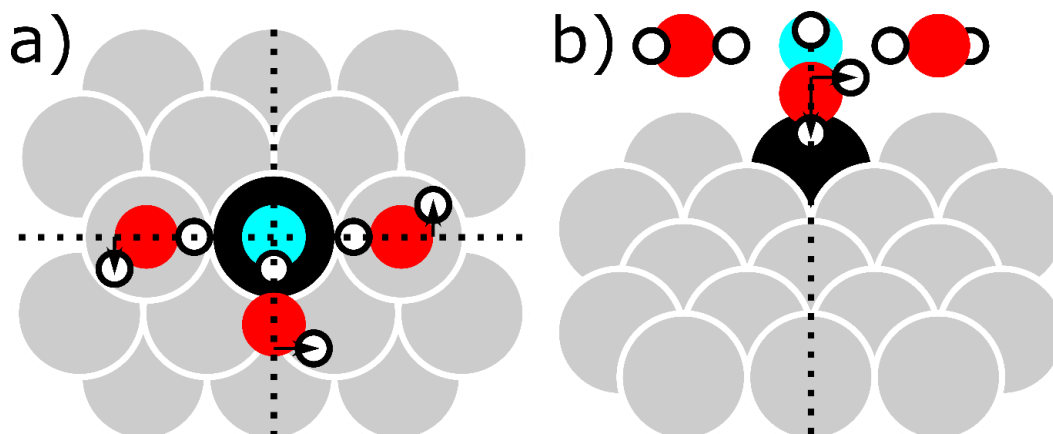

**Figure S.1.** Features which should be consistent between corresponding micro-solvated OH and H<sub>2</sub>O configurations, in (a) top and (b) lateral views. Nanoparticle atoms are gray or (for the adsorption site) black; solvent oxygen atoms are red, solute oxygen atoms are cyan, and hydrogen atoms are white; relevant planes (perpendicular to the point of view) are shown as dashed lines, while defining displacements relative to these planes are shown using arrows.

## S.2. Computational details

All calculations were performed using VASP 5.4.4.<sup>2-5</sup> For each calculation, a 450-eV plane-wave cut-off and a  $10^{-5}$ -eV electronic convergence step cutoff were used, unless specified otherwise. All calculations were performed for the  $\Gamma$ -point only. Free molecules were calculated in an 11 Å cubic unit cell, with  $k_B T = 0.001$  eV and Gaussian smearing of the Fermi level. All systems containing or derived from nanoparticles are calculated using  $k_B T = 0.2$  eV and second-order Methfessel-Paxton smearing of the Fermi level.<sup>6</sup> Systems derived from 38-atom nanoparticles are calculated in 17.8 Å cubic unit cells, while systems derived from 79- and 201-atom nanoparticles are calculated in 26 Å cubic unit cells. The configurations created in Section S.1 are relaxed using a conjugate gradient algorithm until all atomic forces are smaller than  $0.05 \text{ eV \AA}^{-1}$ . After each relaxation, the relaxed configuration is re-assessed according to the rules set out in Section S.1 and, if necessary, corrected by applying mirror transformations to those solvent and solute moieties which are inconsistent.

For each relaxed configuration, vibrational energies are calculated for all O and H atoms through single-atom displacements along each Cartesian unit vector using 0.02 Å steps in both directions to assess the zero-point energies and the vibrational entropies. If no imaginary modes are found, the configuration is considered to be converged and is used for further calculations. If imaginary modes are found, relaxation of the configuration is continued up to  $0.02 \text{ eV \AA}^{-1}$ , and another vibrational energy calculation is performed. If more than one imaginary mode persists in the vibrational energy calculation after additional convergence, an additional vibrational calculation is performed using more dense electronic plane wave sampling (600 eV) and stricter electronic convergence ( $10^{-7}$  eV electronic step size) to reduce noise in the force calculations. Although the stricter criteria may increase forces on configuration ground states converged with the lesser criteria, resulting vibrational modes are sufficiently close to those obtained using the lesser criteria, as shown in Table S.1.

**Table S.1.** Vibrational modes for several converged configurations.

|                                    | Au <sub>79</sub> kink, H <sub>2</sub> O |                 |               |                       | Ir <sub>79</sub> kink, OH |                 |               |                       |
|------------------------------------|-----------------------------------------|-----------------|---------------|-----------------------|---------------------------|-----------------|---------------|-----------------------|
|                                    | Lax<br>(meV)                            | Strict<br>(meV) | Diff<br>(meV) | Corr <sup>a</sup> (-) | Lax<br>(meV)              | Strict<br>(meV) | Diff<br>(meV) | Corr <sup>a</sup> (-) |
| <b>ZPE</b>                         | <b>2601</b>                             | <b>2612</b>     | <b>11</b>     | -                     | <b>2337</b>               | <b>2337</b>     | <b>0</b>      | -                     |
| <b>TS<sub>vib</sub></b>            | <b>574</b>                              | <b>696</b>      | <b>122</b>    | -                     | <b>488</b>                | <b>528</b>      | <b>39</b>     | -                     |
| <b>G<sub>vib</sub><sup>b</sup></b> | <b>2027</b>                             | <b>1916</b>     | <b>-111</b>   | -                     | <b>1849</b>               | <b>1810</b>     | <b>-38</b>    | -                     |
| Mode 1                             | 464.8                                   | 466.2           | 1.4           | 1.00                  | 467.2                     | 466.5           | -0.7          | 1.00                  |
| Mode 2                             | 463.7                                   | 465.8           | 2.1           | 0.91                  | 462.7                     | 461.9           | -0.8          | 1.00                  |
| Mode 3                             | 463.0                                   | 465.4           | 2.4           | 0.90                  | 461.2                     | 459.7           | -1.6          | 1.00                  |
| Mode 4                             | 462.1                                   | 465.1           | 3.0           | 0.99                  | 433.0                     | 431.7           | -1.3          | 1.00                  |
| Mode 5                             | 424.9                                   | 426.9           | 2.0           | 1.00                  | 416.5                     | 415.4           | -1.1          | 1.00                  |
| Mode 6                             | 419.4                                   | 421.7           | 2.4           | 1.00                  | 347.4                     | 347.0           | -0.4          | 1.00                  |
| Mode 7                             | 412.6                                   | 414.4           | 1.8           | 1.00                  | 336.9                     | 336.3           | -0.5          | 1.00                  |
| Mode 8                             | 384.4                                   | 385.9           | 1.5           | 1.00                  | 199.2                     | 198.9           | -0.3          | 1.00                  |
| Mode 9                             | 202.0                                   | 201.7           | -0.3          | 1.00                  | 195.1                     | 194.7           | -0.5          | 0.17                  |
| Mode 10                            | 198.7                                   | 199.0           | 0.3           | 0.99                  | 195.0                     | 194.3           | -0.7          | 0.17                  |
| Mode 11                            | 198.2                                   | 198.4           | 0.2           | 0.99                  | 133.1                     | 132.0           | -1.0          | 1.00                  |
| Mode 12                            | 195.6                                   | 195.6           | 0.1           | 1.00                  | 123.9                     | 123.3           | -0.7          | 0.99                  |
| Mode 13                            | 114.1                                   | 114.7           | 0.6           | 1.00                  | 121.5                     | 121.2           | -0.3          | 0.99                  |
| Mode 14                            | 94.5                                    | 95.5            | 1.0           | 0.99                  | 105.1                     | 104.8           | -0.3          | 1.00                  |
| Mode 15                            | 93.1                                    | 94.0            | 0.9           | 0.99                  | 85.4                      | 85.0            | -0.3          | 1.00                  |
| Mode 16                            | 69.3                                    | 69.8            | 0.5           | 1.00                  | 81.6                      | 81.1            | -0.6          | 1.00                  |
| Mode 17                            | 60.3                                    | 59.8            | -0.5          | 0.99                  | 58.3                      | 57.7            | -0.6          | 0.98                  |
| Mode 18                            | 58.2                                    | 58.2            | 0.0           | 0.99                  | 56.4                      | 55.4            | -1.0          | 0.83                  |
| Mode 19                            | 51.3                                    | 51.6            | 0.2           | 0.78                  | 54.5                      | 54.4            | -0.1          | 0.83                  |
| Mode 20                            | 49.3                                    | 49.8            | 0.5           | 0.78                  | 51.5                      | 49.9            | -1.6          | 0.99                  |
| Mode 21                            | 46.6                                    | 46.0            | -0.6          | 0.99                  | 41.1                      | 40.7            | -0.5          | 0.99                  |
| Mode 22                            | 42.2                                    | 41.3            | -0.9          | 0.99                  | 39.9                      | 39.4            | -0.6          | 0.79                  |
| Mode 23                            | 41.3                                    | 39.9            | -1.3          | 0.99                  | 39.2                      | 38.7            | -0.5          | 0.79                  |
| Mode 24                            | 32.3                                    | 32.3            | 0.0           | 0.70                  | 30.4                      | 31.2            | 0.8           | 0.84                  |
| Mode 25                            | 29.8                                    | 29.8            | 0.0           | 0.69                  | 29.5                      | 30.4            | 0.8           | 0.84                  |
| Mode 26                            | 25.5                                    | 25.2            | -0.3          | 0.98                  | 26.1                      | 26.5            | 0.3           | 0.90                  |
| Mode 27                            | 24.0                                    | 23.0            | -1.0          | 0.98                  | 23.1                      | 23.3            | 0.2           | 0.90                  |
| Mode 28                            | 18.5                                    | 17.3            | -1.2          | 0.70                  | 15.8                      | 16.6            | 0.8           | 0.98                  |
| Mode 29                            | 16.9                                    | 16.7            | -0.3          | 0.65                  | 13.3                      | 14.5            | 1.2           | 0.92                  |
| Mode 30                            | 15.0                                    | 13.9            | -1.1          | 0.94                  | 10.4                      | 13.1            | 2.7           | 0.94                  |
|                                    | Au <sub>79</sub> kink, H <sub>2</sub> O |                 |               |                       | Ir <sub>79</sub> kink, OH |                 |               |                       |
|                                    | Lax<br>(meV)                            | Strict<br>(meV) | Diff<br>(meV) | Corr <sup>a</sup> (-) | Lax<br>(meV)              | Strict<br>(meV) | Diff<br>(meV) | Corr <sup>a</sup> (-) |
| Mode 31                            | 11.5                                    | 10.9            | -0.5          | 0.60                  | 9.1                       | 11.8            | 2.7           | 0.98                  |
| Mode 32                            | 9.6                                     | 8.0             | -1.6          | 0.18                  | 7.3                       | 9.1             | 1.8           | 0.84                  |
| Mode 33                            | 8.0                                     | 7.0             | -1.0          | 0.40                  | 3.6                       | 7.5             | 3.8           | 0.87                  |
| Mode 34                            | 1.2                                     | 5.7             | 4.5           | 0.48                  | -                         | -               | -             | -                     |
| Mode 35                            | <b>9.0 i</b>                            | 4.5             | -             | 0.55                  | -                         | -               | -             | -                     |
| Mode 36                            | <b>9.6 i</b>                            | 3.7             | -             | 0.84                  | -                         | -               | -             | -                     |

*a*: Inner product of lesser and stricter vibrational mode eigenvectors.

*b*: Vibrational free energies as defined in Section S.3.

### S.3. Thermodynamics

Individual formation energies were calculated for all OH and H<sub>2</sub>O (deemed OH<sub>*x*</sub>, *x* = 1,2) configurations on each nanoparticle at sites *s* in micro-solvated and vacuum environments.

Since the full formation energy for micro-solvated H<sub>2</sub>O formation from bulk H<sub>2</sub>O is:

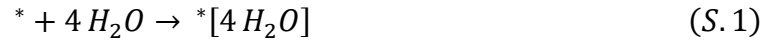

and its micro-solvated \*OH counterpart is:

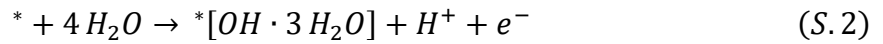

we can use the computational hydrogen electrode to obtain the following formation energies on each metal:<sup>7</sup>

$$\Delta G_{MS}(OH_x; s) = E_{DFT,MS}(OH_x; s) + E_{ZPE,MS}(OH_x; s) - TS_{MS}(OH_x; s) - E_M - 4G_{H_2O} + \frac{(2-x)}{2}G_{H_2} \quad (S.3)$$

in which  $\Delta E_{DFT,MS}$  is the DFT energy of the specific configuration,  $E_{ZPE,MS}$  is the zero-point energy,  $T$  is the temperature (300 K),  $S_{MS}$  is the vibrational entropy, and  $E_M$  is the DFT energy of the pristine nanoparticle.  $G_{H_2O}$  and  $G_{H_2}$  are the Gibbs free energies for H<sub>2</sub>O(*l*) and H<sub>2</sub>(*g*) under standard conditions, respectively, defined using entropies and the heat of fusion for H<sub>2</sub>O from literature,<sup>8</sup> as:

$$G_{H_2O(l)} = E_{DFT}(H_2O) + E_{ZPE}(H_2O) + \Delta H_{fus}(H_2O) - TS_{lit}(H_2O(l))$$

which is -2.46 eV with respect to  $G_{H_2}$  and  $G_{O_2}$ , and

$$G_{H_2(g)} = E_{DFT}(H_2) + E_{ZPE}(H_2) - TS_{lit}(H_2(g))$$

Analogously, individual formation energies were calculated for all vacuum (i.e., non-micro-solvated) OH configurations, described using:  $* + H_2O(l) \rightarrow *OH + H^+ + e^-$ , as:

$$\begin{aligned} \Delta G_{\text{vac}}(\text{OH}_x; s) = & E_{\text{DFT,vac}}(\text{OH}_x; s) + E_{\text{ZPE,vac}}(\text{OH}_x; s) - TS_{\text{vac}}(\text{OH}_x; s) \\ & - E_{\text{DFT,M}} - \Delta G_{\text{H}_2\text{O}} + \frac{1}{2} \Delta G_{\text{H}_2} \end{aligned} \quad (\text{S. 4})$$

From the micro-solvated formation energies, the micro-solvated formation energies for OH are calculated. This micro-solvated formation energy corresponds to the following chemical reaction:

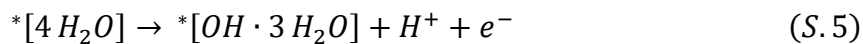

from which we can derive the formation energy relative to analogous to electrochemical formation potentials using the computational hydrogen electrode,<sup>7</sup> as:

$$\Delta G_{f,\text{MS}} = \Delta G_{\text{MS}}(\text{OH}, s) - \Delta G_{\text{MS}}(\text{H}_2\text{O}, s) + \frac{1}{2} \Delta G_{\text{H}_2} \quad (\text{S. 6})$$

Similarly, the vacuum formation energies for OH are calculated with respect to liquid water, as implied above:

$$\Delta G_{f,\text{vac}} = \Delta G_{\text{vac}}(\text{OH}, s) - \Delta G_{\text{H}_2\text{O}} + \frac{1}{2} \Delta G_{\text{H}_2} \quad (\text{S. 7})$$

Using these formation energies, we can obtain the (micro)solvation energy for OH on each specific site:

$$\Omega_{\text{OH}} = \Delta G_{f,\text{MS}} - \Delta G_{f,\text{vac}} \quad (\text{S. 8})$$

## S.4. Formation energy thermodynamics and statistics

Table S.2. Binding and formation energies.

| NP                | site  | $\overline{CN}$ | Micro-solvated   |            |                   |                   |                   | Vacuum     |                  |      |                   | $\Delta G_{f,vac}$ | $\Delta G_{f,MS}$ | $\Omega_{OH}$ |
|-------------------|-------|-----------------|------------------|------------|-------------------|-------------------|-------------------|------------|------------------|------|-------------------|--------------------|-------------------|---------------|
|                   |       |                 |                  | $\Delta E$ | $\Delta E_{ZPE}$  | $TS$              | $\Delta G_{corr}$ | $\Delta E$ | $\Delta E_{ZPE}$ | $TS$ | $\Delta G_{corr}$ |                    |                   |               |
| Ag <sub>38</sub>  | 111   | 6.00            | OH               | -0.78      | 2.22              | 0.55              | -0.06             | 0.34       | 0.32             | 0.11 | -                 | 0.55               | 0.11              | -0.45         |
|                   |       |                 | H <sub>2</sub> O | -1.10      | 2.58              | 0.68              | -0.08             | -          | -                | -    | -                 | -                  | -                 | -             |
|                   | kink  | 4.00            | OH               | -1.07      | 2.26              | 0.56              | -0.06             | 0.23       | 0.34             | 0.11 | -                 | 0.46               | -0.25             | -0.71         |
|                   |       |                 | H <sub>2</sub> O | -1.00      | 2.58              | 0.67              | -0.08             | -          | -                | -    | -                 | -                  | -                 | -             |
| Ag <sub>79</sub>  | 111E  | 5.00            | OH               | -0.87      | 2.26              | 0.52              | -0.06             | 0.93       | 0.31             | 0.12 | -0.05             | 1.06               | 0.06              | -1.00         |
|                   |       |                 | H <sub>2</sub> O | -1.17      | 2.59              | 0.60              | -0.08             | -          | -                | -    | -                 | -                  | -                 | -             |
|                   | 111T  | 6.67            | OH               | -0.63      | 2.24              | 0.60              | -                 | 1.04       | 0.30             | 0.19 | -0.05             | 1.10               | 0.19              | -0.90         |
|                   |       |                 | H <sub>2</sub> O | -1.11      | 2.60              | 0.60              | -0.08             | -          | -                | -    | -                 | -                  | -                 | -             |
|                   | kink  | 4.08            | OH               | -0.78      | 2.25              | 0.54              | -0.06             | 0.93       | 0.31             | 0.10 | -0.05             | 1.08               | -0.02             | -1.11         |
|                   |       |                 | H <sub>2</sub> O | -1.01      | 2.59              | 0.70              | -                 | -          | -                | -    | -                 | -                  | -                 | -             |
| Ag <sub>201</sub> | 100E  | 5.17            | OH               | -0.94      | 2.25              | 0.55              | -0.06             | 0.86       | 0.31             | 0.19 | -                 | 0.99               | -0.01             | -1.00         |
|                   |       |                 | H <sub>2</sub> O | -1.17      | 2.59              | 0.72              | -                 | -          | -                | -    | -                 | -                  | -                 | -             |
|                   | 100T  | 6.33            | OH               | -0.79      | 2.23              | 0.52              | -0.06             | 0.39       | 0.33             | 0.13 | -                 | 0.59               | 0.12              | -0.47         |
|                   |       |                 | H <sub>2</sub> O | -1.11      | 2.59              | 0.66              | -0.08             | -          | -                | -    | -                 | -                  | -                 | -             |
|                   | 111E  | 5.00            | OH               | -0.99      | 2.25              | 0.54              | -0.06             | 0.83       | 0.31             | 0.10 | -0.05             | 0.99               | -0.02             | -1.01         |
|                   |       |                 | H <sub>2</sub> O | -1.21      | 2.60 <sup>a</sup> | 0.72 <sup>a</sup> | -                 | -          | -                | -    | -                 | -                  | -                 | -             |
|                   | 111TC | 7.50            | OH               | -0.35      | 2.23              | 0.54              | -0.06             | 1.14       | 0.30             | 0.11 | -0.05             | 1.28               | 0.35              | -0.93         |
|                   |       |                 | H <sub>2</sub> O | -0.91      | 2.60 <sup>a</sup> | 0.76 <sup>a</sup> | -                 | -          | -                | -    | -                 | -                  | -                 | -             |
|                   | 111TM | 6.92            | OH               | -0.64      | 2.24 <sup>a</sup> | 0.54 <sup>a</sup> | -0.06             | -          | -                | -    | -                 | x                  | 0.19              | x             |
|                   |       |                 | H <sub>2</sub> O | -1.06      | 2.59              | 0.64              | -0.08             | -          | -                | -    | -                 | -                  | -                 | -             |
|                   | kink  | 4.25            | OH               | -0.85      | 2.24              | 0.60              | -0.06             | 0.82       | 0.31             | 0.12 | -0.05             | 0.95               | -0.14             | -1.10         |
|                   |       |                 | H <sub>2</sub> O | -0.97      | 2.57              | 0.65              | -0.08             | -          | -                | -    | -                 | -                  | -                 | -             |
| Au <sub>38</sub>  | 111   | 6.00            | OH               | -0.66      | 2.25              | 0.58              | -                 | x          | x                | x    | -                 | x                  | 0.33              | x             |
|                   |       |                 | H <sub>2</sub> O | -1.22      | 2.60              | 0.62              | -0.08             | -          | -                | -    | -                 | -                  | -                 | -             |
|                   | kink  | 4.00            | OH               | -0.98      | 2.29              | 0.53              | -0.06             | 0.52       | 0.32             | 0.18 | -                 | 0.67               | 0.34              | -0.32         |
|                   |       |                 | H <sub>2</sub> O | -1.58      | 2.62              | 0.67              | -                 | -          | -                | -    | -                 | -                  | -                 | -             |
| Au <sub>79</sub>  | 111E  | 5.00            | OH               | -0.43      | 2.29              | 0.55              | -                 | 1.11       | 0.32             | 0.12 | -0.05             | 1.26               | 0.63              | -0.63         |
|                   |       |                 | H <sub>2</sub> O | -1.23      | 2.60              | 0.68              | -                 | -          | -                | -    | -                 | -                  | -                 | -             |
|                   | 111T  | 6.67            | OH               | -0.17      | 2.26              | 0.48              | -0.06             | 1.37       | 0.32             | 0.18 | -                 | 1.51               | 0.71              | -0.80         |
|                   |       |                 | H <sub>2</sub> O | -1.11      | 2.61              | 0.58              | -0.08             | -          | -                | -    | -                 | -                  | -                 | -             |
|                   | kink  | 4.08            | OH               | -0.38      | 2.30              | 0.58              | -                 | 0.99       | 0.33             | 0.15 | -                 | 1.17               | 0.48              | -0.69         |
|                   |       |                 | H <sub>2</sub> O | -1.10      | 2.62              | 0.66              | -                 | -          | -                | -    | -                 | -                  | -                 | -             |
| Au <sub>201</sub> | 100E  | 5.17            | OH               | -0.47      | 2.30 <sup>a</sup> | 0.55 <sup>a</sup> | -                 | 1.08       | 0.33             | 0.14 | -                 | 1.27               | 0.51              | -0.76         |
|                   |       |                 | H <sub>2</sub> O | -1.13      | 2.60              | 0.62              | -0.08             | -          | -                | -    | -                 | -                  | -                 | -             |
|                   | 100T  | 6.33            | OH               | -0.42      | 2.27 <sup>a</sup> | 0.53 <sup>a</sup> | -0.06             | x          | x                | x    | -                 | x                  | 0.43              | x             |
|                   |       |                 | H <sub>2</sub> O | -1.11      | 2.62 <sup>a</sup> | 0.68 <sup>a</sup> | -                 | -          | -                | -    | -                 | -                  | -                 | -             |
|                   | 111E  | 5.00            | OH               | -0.56      | 2.29              | 0.50              | -0.06             | 1.07       | 0.32             | 0.10 | -0.05             | 1.23               | 0.39              | -0.84         |
|                   |       |                 | H <sub>2</sub> O | -1.16      | 2.61              | 0.60              | -0.08             | -          | -                | -    | -                 | -                  | -                 | -             |
|                   | 111TC | 7.50            | OH               | 0.23       | 2.27              | 0.59              | -                 | 1.41       | 0.31             | 0.11 | -0.05             | 1.56               | 0.89              | -0.67         |
|                   |       |                 | H <sub>2</sub> O | -0.85      | 2.59              | 0.65              | -0.08             | -          | -                | -    | -                 | -                  | -                 | -             |
|                   | 111TM | 6.92            | OH               | -0.08      | 2.27              | 0.55              | -                 | 1.38       | 0.31             | 0.11 | -0.05             | 1.53               | 0.69              | -0.84         |
|                   |       |                 | H <sub>2</sub> O | -1.00      | 2.62              | 0.67              | -                 | -          | -                | -    | -                 | -                  | -                 | -             |
|                   | kink  | 4.25            | OH               | -0.41      | 2.28              | 0.66              | -                 | 0.94       | 0.32             | 0.11 | -0.05             | 1.10               | 0.30              | -0.80         |
|                   |       |                 | H <sub>2</sub> O | -0.94      | 2.58              | 0.65              | -0.08             | -          | -                | -    | -                 | -                  | -                 | -             |
| Ir <sub>38</sub>  | 111   | 6.00            | OH               | -2.02      | 2.29              | 0.46              | -                 | 0.43       | 0.34             | 0.13 | -                 | 0.64               | -0.18             | -0.82         |
|                   |       |                 | H <sub>2</sub> O | -2.10      | 2.64              | 0.56              | -                 | -          | -                | -    | -                 | -                  | -                 | -             |
|                   | kink  | 4.00            | OH               | -2.34      | 2.33              | 0.48              | -                 | -0.46      | 0.35             | 0.10 | -                 | -0.21              | -0.65             | -0.44         |
|                   |       |                 | H <sub>2</sub> O | -1.93      | 2.64              | 0.54              | -                 | -          | -                | -    | -                 | -                  | -                 | -             |
| Ir <sub>79</sub>  | 111E  | 5.00            | OH               | -2.39      | 2.32              | 0.47              | -                 | 0.09       | 0.32             | 0.12 | -0.05             | 0.24               | -0.46             | -0.69         |
|                   |       |                 | H <sub>2</sub> O | -2.14      | 2.64              | 0.58              | -                 | -          | -                | -    | -                 | -                  | -                 | -             |



| <i>NP</i>         | site      | $\overline{CN}$  | Micro-solvated   |            |                  |           |                   | Vacuum     |                  |           |                   | $\Delta G_{f,vac}$ | $\Delta G_{f,MS}$ | $\Omega_{OH}$ |
|-------------------|-----------|------------------|------------------|------------|------------------|-----------|-------------------|------------|------------------|-----------|-------------------|--------------------|-------------------|---------------|
|                   |           |                  |                  | $\Delta E$ | $\Delta E_{ZPE}$ | <i>TS</i> | $\Delta G_{corr}$ | $\Delta E$ | $\Delta E_{ZPE}$ | <i>TS</i> | $\Delta G_{corr}$ |                    |                   |               |
| Ir <sub>79</sub>  | 111T      | 6.67             | OH               | -1.52      | 2.27             | 0.42      | -0.06             | 0.62       | 0.34             | 0.12      | -                 | 0.84               | -0.01             | -0.85         |
|                   |           |                  | H <sub>2</sub> O | -1.83      | 2.64             | 0.55      | -                 | -          | -                | -         | -                 |                    |                   |               |
|                   | kink      | 4.08             | OH               | -2.10      | 2.34             | 0.49      | -                 | -0.32      | 0.33             | 0.14      | -                 | -0.12              | -0.60             | -0.47         |
|                   |           |                  | H <sub>2</sub> O | -1.71      | 2.63             | 0.57      | -                 | -          | -                | -         | -                 |                    |                   |               |
| Ir <sub>201</sub> | 100E      | 5.17             | OH               | -2.34      | 2.32             | 0.47      | -                 | x          | x                | x         | -                 | x                  | -0.48             | x             |
|                   |           |                  | H <sub>2</sub> O | -2.07      | 2.64             | 0.58      | -                 | -          | -                | -         | -                 |                    |                   |               |
|                   | 100T      | 6.33             | OH               | -1.59      | 2.27             | 0.40      | -0.06             | 0.48       | 0.33             | 0.13      | -                 | 0.68               | 0.12              | -0.57         |
|                   |           |                  | H <sub>2</sub> O | -1.95      | 2.64             | 0.50      | -0.08             | -          | -                | -         | -                 |                    |                   |               |
|                   | 111E      | 5.00             | OH               | -2.40      | 2.31             | 0.50      | -                 | -0.10      | 0.35             | 0.11      | -                 | 0.14               | -0.50             | -0.63         |
|                   |           |                  | H <sub>2</sub> O | -2.19      | 2.64             | 0.55      | -                 | -          | -                | -         | -                 |                    |                   |               |
|                   | 111TC     | 7.50             | OH               | -1.06      | 2.32             | 0.42      | -                 | 0.68       | 0.34             | 0.12      | -                 | 0.89               | 0.11              | -0.79         |
|                   |           | H <sub>2</sub> O | -1.34            | 2.64       | 0.56             | -         | -                 | -          | -                | -         |                   |                    |                   |               |
|                   | 111T<br>M | 6.92             | OH               | -1.60      | 2.31             | 0.46      | -                 | 0.53       | 0.33             | 0.14      | -                 | 0.72               | 0.06              | -0.66         |
|                   |           |                  | H <sub>2</sub> O | -1.91      | 2.65             | 0.55      | -                 | -          | -                | -         | -                 |                    |                   |               |
|                   | kink      | 4.25             | OH               | -2.12      | 2.33             | 0.44      | -0.06             | -0.39      | 0.33             | 0.13      | -                 | -0.19              | -0.57             | -0.38         |
|                   |           | H <sub>2</sub> O | -1.72            | 2.61       | 0.54             | -0.08     | -                 | -          | -                | -         |                   |                    |                   |               |
| Pd <sub>38</sub>  | 111       | 6.00             | OH               | -0.69      | 2.26             | 0.47      | -0.06             | 1.05       | 0.32             | 0.21      | -                 | 1.15               | 0.59              | -0.56         |
|                   |           |                  | H <sub>2</sub> O | -1.52      | 2.61             | 0.64      | -                 | -          | -                | -         | -                 |                    |                   |               |
|                   | kink      | 4.00             | OH               | -1.10      | 2.30             | 0.55      | -                 | 0.60       | 0.33             | 0.14      | -                 | 0.78               | 0.10              | -0.69         |
|                   |           |                  | H <sub>2</sub> O | -1.42      | 2.61             | 0.57      | -0.08             | -          | -                | -         | -                 |                    |                   |               |
| Pd <sub>79</sub>  | 111E      | 5.00             | OH               | -1.31      | 2.30             | 0.55      | -                 | 0.64       | 0.32             | 0.10      | -0.05             | 0.81               | 0.11              | -0.70         |
|                   |           |                  | H <sub>2</sub> O | -1.67      | 2.61             | 0.54      | -0.08             | -          | -                | -         | -                 |                    |                   |               |
|                   | 111T      | 6.67             | OH               | -0.93      | 2.28             | 0.52      | -                 | 0.88       | 0.32             | 0.11      | -0.05             | 1.04               | 0.32              | -0.72         |
|                   |           | H <sub>2</sub> O | -1.49            | 2.61       | 0.60             | -         | -                 | -          | -                | -         |                   |                    |                   |               |
|                   | kink      | 4.08             | OH               | -1.07      | 2.29             | 0.53      | -                 | 0.66       | 0.32             | 0.09      | -0.05             | 0.84               | 0.06              | -0.77         |
|                   |           |                  | H <sub>2</sub> O | -1.39      | 2.62             | 0.59      | -                 | -          | -                | -         | -                 |                    |                   |               |
| Pd <sub>201</sub> | 100E      | 5.17             | OH               | -1.12      | 2.29             | 0.55      | -                 | 0.73       | 0.33             | 0.16      | -                 | 0.90               | 0.27              | -0.62         |
|                   |           |                  | H <sub>2</sub> O | -1.59      | 2.61             | 0.68      | -                 | -          | -                | -         | -                 |                    |                   |               |
|                   | 100T      | 6.33             | OH               | -0.69      | 2.27             | 0.54      | -                 | 0.94       | 0.32             | 0.16      | -                 | 1.10               | 0.53              | -0.57         |
|                   |           |                  | H <sub>2</sub> O | -1.52      | 2.62             | 0.60      | -                 | -          | -                | -         | -                 |                    |                   |               |
|                   | 111E      | 5.00             | OH               | -1.29      | 2.29             | 0.48      | -0.06             | 0.67       | 0.32             | 0.12      | -0.05             | 0.81               | 0.11              | -0.70         |
|                   |           |                  | H <sub>2</sub> O | -1.66      | 2.62             | 0.62      | -                 | -          | -                | -         | -                 |                    |                   |               |
|                   | 111TC     | 7.50             | OH               | -0.67      | 2.29             | 0.48      | -                 | 0.91       | 0.32             | 0.11      | -0.05             | 1.06               | 0.45              | -0.62         |
|                   |           | H <sub>2</sub> O | -1.30            | 2.61       | 0.54             | -0.08     | -                 | -          | -                | -         |                   |                    |                   |               |
|                   | 111T<br>M | 6.92             | OH               | -0.92      | 2.28             | 0.50      | -                 | 0.86       | 0.33             | 0.15      | -                 | 1.04               | 0.39              | -0.65         |
|                   |           |                  | H <sub>2</sub> O | -1.56      | 2.62             | 0.58      | -                 | -          | -                | -         | -                 |                    |                   |               |
|                   | kink      | 4.25             | OH               | -1.05      | 2.29             | 0.48      | -0.06             | 0.59       | 0.32             | 0.16      | -                 | 0.75               | 0.13              | -0.62         |
|                   |           |                  | H <sub>2</sub> O | -1.37      | 2.59             | 0.66      | -                 | -          | -                | -         | -                 |                    |                   |               |

*a*: Vibrational data obtained using denser plane wave sampling, as described in S.2.

*x*: No stable configuration available for this adsorption site.

**Table S.3.** Quality of linear relations of OH formation energies between different metals and adsorption site coordination numbers.

| Excluding 38–111T, 201–100T, $MS^a$     |                                         |                           | $\overline{CN}$           | Ag              | Au          | Ir          | Pd          | Pt          | <i>no trend</i> <sup>b</sup> |                              |
|-----------------------------------------|-----------------------------------------|---------------------------|---------------------------|-----------------|-------------|-------------|-------------|-------------|------------------------------|------------------------------|
| <i>MS</i>                               | Ag                                      | <i>R</i>                  | <b>0.93</b>               |                 | <b>0.98</b> | <b>0.96</b> | <b>0.91</b> | <b>0.93</b> | –                            |                              |
|                                         |                                         | <i>max</i> $\Delta G_y x$ | 0.11                      | –               | 0.11        | 0.12        | 0.16        | 0.19        | 0.27                         |                              |
|                                         |                                         | <i>ave</i> $\Delta G_y x$ | 0.05                      |                 | 0.04        | 0.06        | 0.09        | 0.07        | 0.13                         |                              |
|                                         | Au                                      | <i>R</i>                  | <b>0.90</b>               | <b>0.95</b>     |             | <b>0.94</b> | <b>0.90</b> | <b>0.94</b> | –                            |                              |
|                                         |                                         | <i>max</i> $\Delta G_y x$ | 0.13                      | 0.10            | –           | 0.14        | 0.19        | 0.16        | 0.31                         |                              |
|                                         |                                         | <i>ave</i> $\Delta G_y x$ | 0.07                      | 0.04            |             | 0.08        | 0.09        | 0.08        | 0.17                         |                              |
|                                         | Ir                                      | <i>R</i>                  | <b>0.99</b>               | <b>0.92</b>     | <b>0.89</b> |             | <b>0.96</b> | <b>0.96</b> | –                            |                              |
|                                         |                                         | <i>max</i> $\Delta G_y x$ | 0.09                      | 0.17            | 0.23        | –           | 0.26        | 0.21        | 0.42                         |                              |
|                                         |                                         | <i>ave</i> $\Delta G_y x$ | 0.04                      | 0.10            | 0.12        |             | 0.09        | 0.08        | 0.28                         |                              |
|                                         | Pd                                      | <i>R</i>                  | <b>0.95</b>               | <b>0.83</b>     | <b>0.81</b> | <b>0.93</b> |             | <b>0.95</b> | –                            |                              |
|                                         |                                         | <i>max</i> $\Delta G_y x$ | 0.08                      | 0.12            | 0.15        | 0.12        | –           | 0.04        | 0.22                         |                              |
|                                         |                                         | <i>ave</i> $\Delta G_y x$ | 0.04                      | 0.07            | 0.06        | 0.04        |             | 0.03        | 0.14                         |                              |
|                                         | Pt                                      | <i>R</i>                  | <b>0.95</b>               | <b>0.87</b>     | <b>0.89</b> | <b>0.93</b> | <b>0.90</b> |             | –                            |                              |
|                                         |                                         | <i>max</i> $\Delta G_y x$ | 0.11                      | 0.16            | 0.18        | 0.13        | 0.07        | –           | 0.40                         |                              |
|                                         |                                         | <i>ave</i> $\Delta G_y x$ | 0.06                      | 0.10            | 0.08        | 0.07        | 0.05        |             | 0.21                         |                              |
| Excluding 38–111T, 201–100T, <i>vac</i> |                                         |                           | $\overline{CN}$           | Ag              | Au          | Ir          | Pd          | Pt          | <i>no trend</i> <sup>b</sup> |                              |
| <i>vac</i>                              | Ag                                      | <i>R</i>                  | <b>0.66</b>               |                 | <b>0.94</b> | <b>0.66</b> | <b>0.60</b> | <b>0.76</b> | –                            |                              |
|                                         |                                         | <i>max</i> $\Delta G_y x$ | 0.38                      | –               | 0.13        | 0.37        | 0.42        | 0.32        | 0.22                         |                              |
|                                         |                                         | <i>ave</i> $\Delta G_y x$ | 0.11                      |                 | 0.07        | 0.14        | 0.13        | 0.10        | 0.07                         |                              |
|                                         | Au                                      | <i>R</i>                  | <b>0.86</b>               | <b>0.97</b>     |             | <b>0.88</b> | <b>0.82</b> | <b>0.88</b> | –                            |                              |
|                                         |                                         | <i>max</i> $\Delta G_y x$ | 0.34                      | 0.18            | –           | 0.31        | 0.39        | 0.28        | 0.23                         |                              |
|                                         |                                         | <i>ave</i> $\Delta G_y x$ | 0.09                      | 0.07            |             | 0.10        | 0.09        | 0.10        | 0.15                         |                              |
|                                         | Ir                                      | <i>R</i>                  | <b>0.98</b>               | <b>0.81</b>     | <b>0.94</b> |             | <b>0.95</b> | <b>0.95</b> | –                            |                              |
|                                         |                                         | <i>max</i> $\Delta G_y x$ | 0.14                      | 0.48            | 0.32        | –           | 0.23        | 0.36        | 0.55                         |                              |
|                                         |                                         | <i>ave</i> $\Delta G_y x$ | 0.06                      | 0.29            | 0.18        |             | 0.11        | 0.10        | 0.39                         |                              |
|                                         | Pd                                      | <i>R</i>                  | <b>0.96</b>               | <b>0.77</b>     | <b>0.90</b> | <b>0.98</b> |             | <b>0.90</b> | –                            |                              |
|                                         |                                         | <i>max</i> $\Delta G_y x$ | 0.06                      | 0.13            | 0.11        | 0.07        | –           | 0.09        | 0.16                         |                              |
|                                         |                                         | <i>ave</i> $\Delta G_y x$ | 0.03                      | 0.08            | 0.06        | 0.03        |             | 0.04        | 0.11                         |                              |
|                                         | Pt                                      | <i>R</i>                  | <b>0.97</b>               | <b>0.87</b>     | <b>0.94</b> | <b>0.97</b> | <b>0.95</b> |             | –                            |                              |
|                                         |                                         | <i>max</i> $\Delta G_y x$ | 0.10                      | 0.22            | 0.16        | 0.16        | 0.15        | –           | 0.34                         |                              |
|                                         |                                         | <i>ave</i> $\Delta G_y x$ | 0.04                      | 0.10            | 0.09        | 0.06        | 0.08        |             | 0.17                         |                              |
|                                         | Excluding 38 sites, 201–100T, <i>MS</i> |                           |                           | $\overline{CN}$ | Ag          | Au          | Ir          | Pd          | Pt                           | <i>no trend</i> <sup>b</sup> |
|                                         | <i>MS</i>                               | Ag                        | <i>R</i>                  | <b>0.94</b>     |             | <b>0.99</b> | <b>0.97</b> | <b>0.92</b> | <b>0.96</b>                  | –                            |
|                                         |                                         |                           | <i>max</i> $\Delta G_y x$ | 0.08            | –           | 0.06        | 0.09        | 0.13        | 0.09                         | 0.27                         |
| <i>ave</i> $\Delta G_y x$               |                                         |                           | 0.04                      |                 | 0.03        | 0.05        | 0.07        | 0.05        | 0.13                         |                              |
| Au                                      |                                         | <i>R</i>                  | <b>0.88</b>               | <b>0.97</b>     |             | <b>0.93</b> | <b>0.89</b> | <b>0.94</b> | –                            |                              |
|                                         |                                         | <i>max</i> $\Delta G_y x$ | 0.13                      | 0.07            | –           | 0.14        | 0.18        | 0.14        | 0.31                         |                              |
|                                         |                                         | <i>ave</i> $\Delta G_y x$ | 0.07                      | 0.03            |             | 0.08        | 0.10        | 0.07        | 0.15                         |                              |
| Ir                                      |                                         | <i>R</i>                  | <b>0.98</b>               | <b>0.93</b>     | <b>0.86</b> |             | <b>0.96</b> | <b>0.97</b> | –                            |                              |
|                                         |                                         | <i>max</i> $\Delta G_y x$ | 0.09                      | 0.16            | 0.23        | –           | 0.26        | 0.20        | 0.42                         |                              |
|                                         |                                         | <i>ave</i> $\Delta G_y x$ | 0.05                      | 0.09            | 0.13        |             | 0.09        | 0.07        | 0.27                         |                              |
| Pd                                      |                                         | <i>R</i>                  | <b>0.94</b>               | <b>0.84</b>     | <b>0.79</b> | <b>0.92</b> |             | <b>0.95</b> | –                            |                              |
|                                         |                                         | <i>max</i> $\Delta G_y x$ | 0.09                      | 0.11            | 0.15        | 0.12        | –           | 0.05        | 0.22                         |                              |
|                                         |                                         | <i>ave</i> $\Delta G_y x$ | 0.04                      | 0.06            | 0.07        | 0.04        |             | 0.03        | 0.13                         |                              |
| Pt                                      |                                         | <i>R</i>                  | <b>0.96</b>               | <b>0.92</b>     | <b>0.89</b> | <b>0.93</b> | <b>0.90</b> |             | –                            |                              |
|                                         |                                         | <i>max</i> $\Delta G_y x$ | 0.11                      | 0.12            | 0.18        | 0.13        | 0.07        | –           | 0.40                         |                              |
|                                         |                                         | <i>ave</i> $\Delta G_y x$ | 0.05                      | 0.08            | 0.09        | 0.06        | 0.05        |             | 0.19                         |                              |

| Excluding 38 sites, 201–100T, <i>vac</i>    |    |                           | $\overline{CN}$ | Ag          | Au          | Ir          | Pd          | Pt          | <i>no trend</i> <sup>b</sup> |
|---------------------------------------------|----|---------------------------|-----------------|-------------|-------------|-------------|-------------|-------------|------------------------------|
| <i>vac</i>                                  | Ag | <i>R</i>                  | <b>0.78</b>     |             | <b>0.80</b> | <b>0.77</b> | <b>0.79</b> | <b>0.87</b> | –                            |
|                                             |    | <i>max</i> $\Delta G_y x$ | 0.10            | –           | 0.09        | 0.09        | 0.09        | 0.10        | 0.22                         |
|                                             |    | <i>ave</i> $\Delta G_y x$ | 0.06            |             | 0.05        | 0.06        | 0.06        | 0.04        | 0.07                         |
|                                             | Au | <i>R</i>                  | <b>0.98</b>     | <b>0.89</b> |             | <b>0.99</b> | <b>0.98</b> | <b>0.95</b> | –                            |
|                                             |    | <i>max</i> $\Delta G_y x$ | 0.05            | 0.18        | –           | 0.04        | 0.06        | 0.12        | 0.23                         |
|                                             |    | <i>ave</i> $\Delta G_y x$ | 0.03            | 0.08        |             | 0.02        | 0.03        | 0.04        | 0.15                         |
|                                             | Ir | <i>R</i>                  | <b>0.98</b>     | <b>0.88</b> | <b>0.99</b> |             | <b>0.95</b> | <b>0.93</b> | –                            |
|                                             |    | <i>max</i> $\Delta G_y x$ | 0.14            | 0.49        | 0.10        | –           | 0.24        | 0.36        | 0.55                         |
|                                             |    | <i>ave</i> $\Delta G_y x$ | 0.07            | 0.20        | 0.05        |             | 0.10        | 0.11        | 0.39                         |
|                                             | Pd | <i>R</i>                  | <b>0.95</b>     | <b>0.89</b> | <b>0.99</b> | <b>0.98</b> |             | <b>0.90</b> | –                            |
|                                             |    | <i>max</i> $\Delta G_y x$ | 0.06            | 0.12        | 0.05        | 0.06        | –           | 0.09        | 0.16                         |
|                                             |    | <i>ave</i> $\Delta G_y x$ | 0.03            | 0.06        | 0.02        | 0.03        |             | 0.04        | 0.11                         |
|                                             | Pt | <i>R</i>                  | <b>0.97</b>     | <b>0.93</b> | <b>0.97</b> | <b>0.97</b> | <b>0.95</b> |             | –                            |
|                                             |    | <i>max</i> $\Delta G_y x$ | 0.10            | 0.21        | 0.13        | 0.16        | 0.13        | –           | 0.34                         |
|                                             |    | <i>ave</i> $\Delta G_y x$ | 0.04            | 0.07        | 0.05        | 0.06        | 0.07        |             | 0.17                         |
| Excluding 38, 79 sites, 201–100T, <i>MS</i> |    |                           | $\overline{CN}$ | Ag          | Au          | Ir          | Pd          | Pt          | <i>no trend</i> <sup>b</sup> |
| <i>MS</i>                                   | Ag | <i>R</i>                  | <b>0.99</b>     |             | <b>0.99</b> | <b>0.98</b> | <b>0.96</b> | <b>0.98</b> | –                            |
|                                             |    | <i>max</i> $\Delta G_y x$ | 0.04            | –           | 0.05        | 0.07        | 0.10        | 0.07        | 0.28                         |
|                                             |    | <i>ave</i> $\Delta G_y x$ | 0.02            |             | 0.02        | 0.05        | 0.06        | 0.04        | 0.16                         |
|                                             | Au | <i>R</i>                  | <b>0.98</b>     | <b>0.99</b> |             | <b>0.97</b> | <b>0.98</b> | <b>0.99</b> | –                            |
|                                             |    | <i>max</i> $\Delta G_y x$ | 0.06            | 0.05        | –           | 0.10        | 0.08        | 0.04        | 0.33                         |
|                                             |    | <i>ave</i> $\Delta G_y x$ | 0.04            | 0.02        |             | 0.07        | 0.06        | 0.03        | 0.19                         |
|                                             | Ir | <i>R</i>                  | <b>0.98</b>     | <b>0.96</b> | <b>0.94</b> |             | <b>0.96</b> | <b>0.98</b> | –                            |
|                                             |    | <i>max</i> $\Delta G_y x$ | 0.07            | 0.15        | 0.16        | –           | 0.21        | 0.15        | 0.39                         |
|                                             |    | <i>ave</i> $\Delta G_y x$ | 0.05            | 0.08        | 0.08        |             | 0.09        | 0.07        | 0.29                         |
|                                             | Pd | <i>R</i>                  | <b>0.94</b>     | <b>0.92</b> | <b>0.96</b> | <b>0.92</b> |             | <b>0.99</b> | –                            |
|                                             |    | <i>max</i> $\Delta G_y x$ | 0.08            | 0.09        | 0.06        | 0.09        | –           | 0.03        | 0.18                         |
|                                             |    | <i>ave</i> $\Delta G_y x$ | 0.03            | 0.04        | 0.03        | 0.04        |             | 0.02        | 0.12                         |
|                                             | Pt | <i>R</i>                  | <b>0.98</b>     | <b>0.97</b> | <b>0.99</b> | <b>0.96</b> | <b>0.98</b> |             | –                            |
|                                             |    | <i>max</i> $\Delta G_y x$ | 0.09            | 0.11        | 0.05        | 0.12        | 0.05        | –           | 0.35                         |
|                                             |    | <i>ave</i> $\Delta G_y x$ | 0.04            | 0.05        | 0.03        | 0.07        | 0.03        |             | 0.22                         |
| Excluding 38, 79 sites, 201–100T, <i>MS</i> |    |                           | $\overline{CN}$ | Ag          | Au          | Ir          | Pd          | Pt          | <i>no trend</i> <sup>b</sup> |
| <i>MS</i>                                   | Ag | <i>R</i>                  | <b>0.98</b>     |             | <b>0.96</b> | <b>0.98</b> | <b>0.94</b> | <b>0.99</b> | –                            |
|                                             |    | <i>max</i> $\Delta G_y x$ | 0.03            | –           | 0.05        | 0.04        | 0.08        | 0.03        | 0.23                         |
|                                             |    | <i>ave</i> $\Delta G_y x$ | 0.02            |             | 0.04        | 0.03        | 0.04        | 0.02        | 0.11                         |
|                                             | Au | <i>R</i>                  | <b>0.99</b>     | <b>0.98</b> |             | <b>1.00</b> | <b>0.99</b> | <b>0.99</b> | –                            |
|                                             |    | <i>max</i> $\Delta G_y x$ | 0.03            | 0.07        | –           | 0.03        | 0.04        | 0.03        | 0.24                         |
|                                             |    | <i>ave</i> $\Delta G_y x$ | 0.02            | 0.04        |             | 0.02        | 0.02        | 0.02        | 0.16                         |
|                                             | Ir | <i>R</i>                  | <b>1.00</b>     | <b>0.99</b> | <b>1.00</b> |             | <b>0.99</b> | <b>0.99</b> | –                            |
|                                             |    | <i>max</i> $\Delta G_y x$ | 0.05            | 0.12        | 0.06        | –           | 0.08        | 0.07        | 0.58                         |
|                                             |    | <i>ave</i> $\Delta G_y x$ | 0.03            | 0.08        | 0.04        |             | 0.06        | 0.04        | 0.42                         |
|                                             | Pd | <i>R</i>                  | <b>0.98</b>     | <b>0.97</b> | <b>1.00</b> | <b>0.99</b> |             | <b>0.98</b> | –                            |
|                                             |    | <i>max</i> $\Delta G_y x$ | 0.04            | 0.06        | 0.03        | 0.03        | –           | 0.04        | 0.16                         |
|                                             |    | <i>ave</i> $\Delta G_y x$ | 0.02            | 0.03        | 0.01        | 0.02        |             | 0.02        | 0.11                         |
|                                             | Pt | <i>R</i>                  | <b>1.00</b>     | <b>0.99</b> | <b>0.99</b> | <b>1.00</b> | <b>0.99</b> |             | –                            |
|                                             |    | <i>max</i> $\Delta G_y x$ | 0.01            | 0.05        | 0.04        | 0.04        | 0.08        | –           | 0.31                         |
|                                             |    | <i>ave</i> $\Delta G_y x$ | 0.01            | 0.03        | 0.03        | 0.02        | 0.04        |             | 0.21                         |

a: All  $\Delta G_y$  in this table are in eV.

b: Null hypothesis, in which deviations are relative to the average as opposed to linear regression.

**Table S.4.** Parameters for linear regressions of OH formation energies between different metals and adsorption site coordination numbers.

|                                  | Metal y | Parameters <sup>a</sup> | $\overline{CN}$ | Metal x     |             |             |             |              |             |
|----------------------------------|---------|-------------------------|-----------------|-------------|-------------|-------------|-------------|--------------|-------------|
|                                  |         |                         |                 | Ag          | Au          | Ir          | Pd          | Pt           |             |
| Excluding 38–111T, 201–100T      | MS      | Ag                      | a               | <b>0.13</b> | –           | <b>0.91</b> | <b>0.55</b> | <b>1.07</b>  | <b>0.72</b> |
|                                  |         |                         | b               | –0.67       | –           | –0.46       | 0.23        | –0.19        | –0.08       |
|                                  |         | Au                      | a               | <b>0.13</b> | <b>1.00</b> | –           | <b>0.56</b> | <b>1.10</b>  | <b>0.77</b> |
|                                  |         |                         | b               | –0.17       | 0.51        | –           | 0.74        | 0.31         | 0.43        |
|                                  |         | Ir                      | a               | <b>0.23</b> | <b>1.53</b> | <b>1.40</b> | –           | <b>1.97</b>  | <b>1.28</b> |
|                                  |         |                         | b               | –1.59       | –0.40       | –1.11       | –           | –0.77        | –0.55       |
|                                  |         | Pd                      | a               | <b>0.10</b> | <b>0.65</b> | <b>0.60</b> | <b>0.43</b> | –            | <b>0.62</b> |
|                                  |         |                         | b               | –0.35       | 0.19        | –0.12       | 0.37        | –            | 0.12        |
|                                  |         | Pt                      | a               | <b>0.16</b> | <b>1.05</b> | <b>1.02</b> | <b>0.68</b> | <b>1.50</b>  | –           |
|                                  |         |                         | b               | –0.72       | 0.12        | –0.40       | 0.39        | –0.17        | –           |
|                                  | vac     | Ag                      | a               | <b>0.12</b> | –           | <b>0.80</b> | <b>0.36</b> | <b>1.22</b>  | <b>0.85</b> |
|                                  |         |                         | b               | 0.35        | –           | 0.01        | 0.91        | –0.08        | 0.36        |
|                                  |         | Au                      | a               | <b>0.18</b> | <b>1.09</b> | –           | <b>0.56</b> | <b>1.85</b>  | <b>1.08</b> |
|                                  |         |                         | b               | 0.27        | 0.14        | –           | 1.09        | –0.39        | 0.42        |
| Ir                               | a       | <b>0.33</b>             | <b>1.22</b>     | <b>1.39</b> | –           | <b>3.42</b> | <b>1.85</b> |              |             |
|                                  | b       | –1.50                   | –0.98           | –1.45       | –           | –2.76       | –1.16       |              |             |
| Pd                               | a       | <b>0.09</b>             | <b>0.29</b>     | <b>0.36</b> | <b>0.27</b> | –           | <b>0.49</b> |              |             |
|                                  | b       | 0.41                    | 0.58            | 0.44        | 0.81        | –           | 0.51        |              |             |
| Pt                               | a       | <b>0.17</b>             | <b>0.67</b>     | <b>0.71</b> | <b>0.48</b> | <b>1.66</b> | –           |              |             |
|                                  | b       | –0.12                   | 0.07            | –0.12       | 0.64        | –0.70       | –           |              |             |
| Excluding 38 sites, 201–100T     | MS      | Ag                      | a               | <b>0.12</b> | –           | <b>0.81</b> | <b>0.49</b> | <b>0.91</b>  | <b>0.63</b> |
|                                  |         |                         | b               | –0.58       | –           | –0.39       | 0.22        | –0.14        | –0.04       |
|                                  |         | Au                      | a               | <b>0.13</b> | <b>1.17</b> | –           | <b>0.54</b> | <b>1.03</b>  | <b>0.73</b> |
|                                  |         |                         | b               | –0.15       | 0.49        | –           | 0.74        | 0.34         | 0.45        |
|                                  |         | Ir                      | a               | <b>0.23</b> | <b>1.78</b> | <b>1.38</b> | –           | <b>1.91</b>  | <b>1.22</b> |
|                                  |         |                         | b               | –1.60       | –0.44       | –1.10       | –           | –0.75        | –0.52       |
|                                  |         | Pd                      | a               | <b>0.11</b> | <b>0.77</b> | <b>0.60</b> | <b>0.44</b> | –            | <b>0.61</b> |
|                                  |         |                         | b               | –0.37       | 0.17        | –0.12       | 0.37        | –            | 0.12        |
|                                  |         | Pt                      | a               | <b>0.17</b> | <b>1.35</b> | <b>1.08</b> | <b>0.71</b> | <b>1.54</b>  | –           |
|                                  |         |                         | b               | –0.79       | 0.08        | –0.44       | 0.39        | –0.18        | –           |
|                                  | vac     | Ag                      | a               | <b>0.07</b> | –           | <b>0.51</b> | <b>0.19</b> | <b>0.73</b>  | <b>0.48</b> |
|                                  |         |                         | b               | 0.70        | –           | 0.40        | 1.02        | 0.42         | 0.69        |
|                                  |         | Au                      | a               | <b>0.14</b> | <b>1.24</b> | –           | <b>0.41</b> | <b>1.41</b>  | <b>0.80</b> |
|                                  |         |                         | b               | 0.57        | –0.02       | –           | 1.19        | 0.05         | 0.69        |
| Ir                               | a       | <b>0.32</b>             | <b>3.14</b>     | <b>2.37</b> | –           | <b>3.26</b> | <b>1.89</b> |              |             |
|                                  | b       | –1.47                   | –3.08           | –2.81       | –           | –2.60       | –1.19       |              |             |
| Pd                               | a       | <b>0.09</b>             | <b>0.86</b>     | <b>0.68</b> | <b>0.28</b> | –           | <b>0.53</b> |              |             |
|                                  | b       | 0.39                    | –0.03           | 0.00        | 0.81        | –           | 0.48        |              |             |
| Pt                               | a       | <b>0.16</b>             | <b>1.59</b>     | <b>1.12</b> | <b>0.46</b> | <b>1.54</b> | –           |              |             |
|                                  | b       | –0.08                   | –0.92           | –0.69       | 0.65        | –0.58       | –           |              |             |
| Excluding 38, 79 sites, 201–100T | MS      | Ag                      | a               | <b>0.14</b> | –           | <b>0.75</b> | <b>0.46</b> | <b>0.81</b>  | <b>0.53</b> |
|                                  |         |                         | b               | –0.73       | –           | –0.32       | 0.18        | –0.17        | –0.07       |
|                                  |         | Au                      | a               | <b>0.15</b> | <b>1.15</b> | –           | <b>0.44</b> | <b>0.75</b>  | <b>0.51</b> |
|                                  |         |                         | b               | –0.37       | 0.44        | –           | 0.63        | 0.30         | 0.38        |
|                                  |         | Ir                      | a               | <b>0.25</b> | <b>1.71</b> | <b>1.07</b> | –           | <b>1.84</b>  | <b>1.13</b> |
|                                  |         |                         | b               | –1.70       | –0.35       | –0.78       | –           | –0.79        | –0.54       |
|                                  |         | Pd                      | a               | <b>0.11</b> | <b>0.76</b> | <b>0.46</b> | <b>0.47</b> | –            | <b>0.58</b> |
|                                  |         |                         | b               | –0.36       | 0.25        | 0.07        | 0.41        | –            | 0.14        |
|                                  |         | Pt                      | a               | <b>0.21</b> | <b>1.43</b> | <b>0.90</b> | <b>0.82</b> | <b>1.67</b>  | –           |
|                                  |         |                         | b               | –0.93       | 0.18        | –0.19       | 0.47        | –0.23        | –           |
|                                  | vac     | Ag                      | a               | <b>0.05</b> | –           | <b>0.76</b> | <b>0.07</b> | <b>–0.25</b> | <b>0.05</b> |
|                                  |         |                         | b               | 0.68        | –           | 0.08        | 0.93        | 1.19         | 0.92        |
|                                  |         | Au                      | a               | <b>0.14</b> | <b>1.21</b> | –           | <b>0.45</b> | <b>1.43</b>  | <b>0.79</b> |
|                                  |         |                         | b               | 0.51        | 0.02        | –           | 1.18        | 0.03         | 0.67        |
| Ir                               | a       | <b>0.33</b>             | <b>0.21</b>     | <b>2.22</b> | –           | <b>2.74</b> | <b>1.78</b> |              |             |
|                                  | b       | –1.55                   | 0.18            | –2.62       | –           | –2.17       | –1.17       |              |             |
| Pd                               | a       | <b>0.11</b>             | <b>–0.10</b>    | <b>0.69</b> | <b>0.34</b> | –           | <b>0.59</b> |              |             |
|                                  | b       | 0.32                    | 1.02            | –0.01       | 0.80        | –           | 0.43        |              |             |
| Pt                               | a       | <b>0.19</b>             | <b>0.05</b>     | <b>1.24</b> | <b>0.56</b> | <b>1.60</b> | –           |              |             |
|                                  | b       | –0.23                   | 0.79            | –0.82       | 0.66        | –0.64       | –           |              |             |

a: Parameters for linear regressions  $\overline{\Delta G}_y = a\overline{\Delta G}_x + b$ , for which  $\overline{\Delta G}_y$ ,  $\overline{\Delta G}_x$ ,  $a$ , and  $b$  are in eV.

**Table S.5.** Quality of linear relations between formation site binding energies.

|             | Site<br>( $\overline{CN}$ ) | Parameters <sup>a</sup>     | MS, 38      |             | MS, 79      |             |             | MS, 201     |             |             |             |             |             |
|-------------|-----------------------------|-----------------------------|-------------|-------------|-------------|-------------|-------------|-------------|-------------|-------------|-------------|-------------|-------------|
|             |                             |                             | 111         | kink        | 111E        | 111T        | kink        | 100E        | 100T        | 111E        | 111TC       | 111TM       | kink        |
| MS,<br>38   | 111<br>(6.00)               | $R$                         |             | <b>0.84</b> | <b>0.65</b> | <b>0.61</b> | <b>0.71</b> | <b>0.84</b> | <b>0.79</b> | <b>0.77</b> | <b>0.60</b> | <b>0.68</b> | <b>0.86</b> |
|             |                             | $\max \Delta G_y  x$        | –           | 0.25        | 0.36        | 0.35        | 0.33        | 0.26        | 0.21        | 0.29        | 0.39        | 0.34        | 0.22        |
|             |                             | $\text{ave } \Delta G_y  x$ |             | 0.10        | 0.16        | 0.17        | 0.15        | 0.10        | 0.14        | 0.14        | 0.15        | 0.14        | 0.10        |
| MS,<br>79   | 111E<br>(5.00)              | $R$                         | <b>0.84</b> |             | <b>0.94</b> | <b>0.97</b> | <b>0.99</b> | <b>0.95</b> | <b>0.49</b> | <b>0.98</b> | <b>0.95</b> | <b>0.93</b> | <b>0.94</b> |
|             |                             | $\max \Delta G_y  x$        | 0.32        | –           | 0.16        | 0.16        | 0.16        | 0.06        | 0.35        | 0.14        | 0.22        | 0.13        | 0.08        |
|             |                             | $\text{ave } \Delta G_y  x$ | 0.15        |             | 0.11        | 0.12        | 0.09        | 0.02        | 0.20        | 0.07        | 0.09        | 0.09        | 0.04        |
| MS,<br>79   | 111T<br>(6.67)              | $R$                         | <b>0.61</b> | <b>0.92</b> | <b>0.97</b> |             | <b>0.96</b> | <b>0.92</b> | <b>0.50</b> | <b>0.94</b> | <b>0.96</b> | <b>0.96</b> | <b>0.91</b> |
|             |                             | $\max \Delta G_y  x$        | 0.35        | 0.14        | 0.09        | –           | 0.10        | 0.14        | 0.37        | 0.11        | 0.13        | 0.12        | 0.15        |
|             |                             | $\text{ave } \Delta G_y  x$ | 0.14        | 0.08        | 0.04        |             | 0.06        | 0.09        | 0.16        | 0.07        | 0.05        | 0.05        | 0.09        |
| MS,<br>201  | 100E<br>(5.17)              | $R$                         | <b>0.71</b> | <b>0.95</b> | <b>0.99</b> | <b>0.96</b> |             | <b>0.97</b> | <b>0.52</b> | <b>1.00</b> | <b>0.93</b> | <b>0.92</b> | <b>0.97</b> |
|             |                             | $\max \Delta G_y  x$        | 0.41        | 0.16        | 0.05        | 0.15        | –           | 0.10        | 0.45        | 0.05        | 0.16        | 0.24        | 0.14        |
|             |                             | $\text{ave } \Delta G_y  x$ | 0.21        | 0.10        | 0.03        | 0.09        |             | 0.08        | 0.26        | 0.03        | 0.11        | 0.11        | 0.07        |
| MS,<br>201  | 100T<br>(6.33)              | $R$                         | <b>0.84</b> | <b>1.00</b> | <b>0.95</b> | <b>0.92</b> | <b>0.97</b> |             | <b>0.71</b> | <b>0.98</b> | <b>0.93</b> | <b>0.94</b> | <b>0.99</b> |
|             |                             | $\max \Delta G_y  x$        | 0.31        | 0.06        | 0.15        | 0.18        | 0.10        | –           | 0.34        | 0.09        | 0.21        | 0.15        | 0.06        |
|             |                             | $\text{ave } \Delta G_y  x$ | 0.15        | 0.02        | 0.10        | 0.12        | 0.08        |             | 0.21        | 0.06        | 0.10        | 0.10        | 0.03        |
| MS,<br>201  | 111E<br>(5.00)              | $R$                         | <b>0.79</b> | <b>0.75</b> | <b>0.49</b> | <b>0.50</b> | <b>0.52</b> | <b>0.71</b> |             | <b>0.57</b> | <b>0.64</b> | <b>0.71</b> | <b>0.68</b> |
|             |                             | $\max \Delta G_y  x$        | 0.22        | 0.20        | 0.26        | 0.27        | 0.26        | 0.21        | –           | 0.25        | 0.20        | 0.20        | 0.24        |
|             |                             | $\text{ave } \Delta G_y  x$ | 0.09        | 0.12        | 0.17        | 0.17        | 0.16        | 0.12        |             | 0.15        | 0.15        | 0.14        | 0.12        |
| MS,<br>201  | 111TC<br>(7.50)             | $R$                         | <b>0.77</b> | <b>0.97</b> | <b>0.98</b> | <b>0.94</b> | <b>1.00</b> | <b>0.98</b> | <b>0.57</b> |             | <b>0.92</b> | <b>0.92</b> | <b>0.99</b> |
|             |                             | $\max \Delta G_y  x$        | 0.31        | 0.12        | 0.09        | 0.14        | 0.05        | 0.08        | 0.34        | –           | 0.14        | 0.18        | 0.07        |
|             |                             | $\text{ave } \Delta G_y  x$ | 0.16        | 0.06        | 0.04        | 0.09        | 0.02        | 0.05        | 0.21        |             | 0.10        | 0.10        | 0.04        |
| MS,<br>201  | 111TM<br>(6.92)             | $R$                         | <b>0.60</b> | <b>0.94</b> | <b>0.95</b> | <b>0.96</b> | <b>0.93</b> | <b>0.93</b> | <b>0.64</b> | <b>0.92</b> |             | <b>0.98</b> | <b>0.90</b> |
|             |                             | $\max \Delta G_y  x$        | 0.35        | 0.16        | 0.12        | 0.14        | 0.13        | 0.16        | 0.36        | 0.12        | –           | 0.07        | 0.18        |
|             |                             | $\text{ave } \Delta G_y  x$ | 0.17        | 0.07        | 0.06        | 0.06        | 0.08        | 0.08        | 0.17        | 0.09        |             | 0.04        | 0.10        |
| vac,<br>38  | 111<br>(6.00)               | $R$                         | <b>0.68</b> | <b>0.96</b> | <b>0.93</b> | <b>0.96</b> | <b>0.92</b> | <b>0.94</b> | <b>0.71</b> | <b>0.92</b> | <b>0.98</b> |             | <b>0.92</b> |
|             |                             | $\max \Delta G_y  x$        | 0.28        | 0.08        | 0.15        | 0.11        | 0.16        | 0.10        | 0.29        | 0.15        | 0.06        | –           | 0.11        |
|             |                             | $\text{ave } \Delta G_y  x$ | 0.13        | 0.06        | 0.06        | 0.05        | 0.07        | 0.07        | 0.12        | 0.08        | 0.03        |             | 0.08        |
| vac,<br>38  | kink<br>(4.00)              | $R$                         | <b>0.86</b> | <b>0.99</b> | <b>0.94</b> | <b>0.91</b> | <b>0.97</b> | <b>0.99</b> | <b>0.68</b> | <b>0.99</b> | <b>0.90</b> | <b>0.92</b> |             |
|             |                             | $\max \Delta G_y  x$        | 0.26        | 0.06        | 0.17        | 0.17        | 0.13        | 0.05        | 0.30        | 0.08        | 0.23        | 0.15        | –           |
|             |                             | $\text{ave } \Delta G_y  x$ | 0.12        | 0.04        | 0.09        | 0.11        | 0.07        | 0.02        | 0.19        | 0.04        | 0.11        | 0.11        |             |
| vac,<br>38  | 111<br>(6.00)               | $R$                         |             | <b>0.61</b> | <b>0.38</b> | <b>0.61</b> | <b>0.42</b> | <b>0.57</b> | <b>0.60</b> | <b>0.50</b> | <b>0.32</b> | <b>0.56</b> | <b>0.63</b> |
|             |                             | $\max \Delta G_y  x$        | –           | 0.25        | 0.33        | 0.25        | 0.32        | 0.27        | 0.28        | 0.29        | 0.36        | 0.29        | 0.23        |
|             |                             | $\text{ave } \Delta G_y  x$ |             | 0.18        | 0.18        | 0.18        | 0.18        | 0.18        | 0.15        | 0.18        | 0.18        | 0.17        | 0.17        |
| vac,<br>79  | 111E<br>(5.00)              | $R$                         | <b>0.93</b> |             | <b>0.81</b> | <b>0.73</b> | <b>0.87</b> | <b>0.93</b> | <b>0.67</b> | <b>0.90</b> | <b>0.73</b> | <b>0.75</b> | <b>0.94</b> |
|             |                             | $\max \Delta G_y  x$        | 0.17        | –           | 0.32        | 0.33        | 0.27        | 0.18        | 0.38        | 0.22        | 0.37        | 0.30        | 0.17        |
|             |                             | $\text{ave } \Delta G_y  x$ | 0.11        |             | 0.17        | 0.22        | 0.15        | 0.12        | 0.24        | 0.13        | 0.21        | 0.21        | 0.11        |
| vac,<br>79  | 111T<br>(6.67)              | $R$                         | <b>0.56</b> | <b>0.81</b> |             | <b>0.83</b> | <b>0.94</b> | <b>0.85</b> | <b>0.29</b> | <b>0.92</b> | <b>0.81</b> | <b>0.74</b> | <b>0.85</b> |
|             |                             | $\max \Delta G_y  x$        | 0.35        | 0.37        | –           | 0.36        | 0.23        | 0.32        | 0.48        | 0.25        | 0.37        | 0.42        | 0.31        |
|             |                             | $\text{ave } \Delta G_y  x$ | 0.27        | 0.17        |             | 0.14        | 0.09        | 0.15        | 0.30        | 0.10        | 0.15        | 0.18        | 0.15        |
| vac,<br>79  | kink<br>(4.00)              | $R$                         | <b>0.37</b> | <b>0.72</b> | <b>0.90</b> |             | <b>0.87</b> | <b>0.74</b> | <b>0.12</b> | <b>0.83</b> | <b>0.80</b> | <b>0.77</b> | <b>0.75</b> |
|             |                             | $\max \Delta G_y  x$        | 0.41        | 0.24        | 0.17        | –           | 0.18        | 0.23        | 0.43        | 0.19        | 0.27        | 0.25        | 0.22        |
|             |                             | $\text{ave } \Delta G_y  x$ | 0.19        | 0.15        | 0.09        |             | 0.11        | 0.15        | 0.19        | 0.12        | 0.11        | 0.13        | 0.15        |
| vac,<br>201 | 100E<br>(5.17)              | $R$                         | <b>0.64</b> | <b>0.79</b> | <b>0.88</b> | <b>0.76</b> |             | <b>0.84</b> | <b>0.28</b> | <b>0.90</b> | <b>0.72</b> | <b>0.67</b> | <b>0.85</b> |
|             |                             | $\max \Delta G_y  x$        | 0.51        | 0.55        | 0.40        | 0.53        | –           | 0.49        | 0.68        | 0.40        | 0.54        | 0.60        | 0.48        |
|             |                             | $\text{ave } \Delta G_y  x$ | 0.34        | 0.22        | 0.19        | 0.24        |             | 0.20        | 0.39        | 0.16        | 0.28        | 0.27        | 0.19        |
| vac,<br>201 | 100T<br>(6.33)              | $R$                         | <b>0.08</b> | <b>0.52</b> | <b>0.88</b> | <b>0.82</b> | <b>0.89</b> |             | <b>0.39</b> | <b>0.85</b> | <b>0.61</b> | <b>0.55</b> | <b>0.65</b> |
|             |                             | $\max \Delta G_y  x$        | 0.31        | 0.23        | 0.13        | 0.16        | 0.14        | –           | 0.31        | 0.16        | 0.26        | 0.25        | 0.18        |
|             |                             | $\text{ave } \Delta G_y  x$ | 0.15        | 0.16        | 0.07        | 0.10        | 0.07        |             | 0.15        | 0.09        | 0.13        | 0.15        | 0.15        |
| vac,<br>201 | 111E<br>(5.00)              | $R$                         | <b>0.80</b> | <b>0.80</b> | <b>0.50</b> | <b>0.72</b> | <b>0.51</b> | <b>0.73</b> |             | <b>0.57</b> | <b>0.73</b> | <b>0.89</b> | <b>0.70</b> |
|             |                             | $\max \Delta G_y  x$        | 0.21        | 0.23        | 0.32        | 0.27        | 0.32        | 0.27        | –           | 0.31        | 0.24        | 0.16        | 0.27        |
|             |                             | $\text{ave } \Delta G_y  x$ | 0.11        | 0.12        | 0.16        | 0.13        | 0.16        | 0.13        |             | 0.16        | 0.12        | 0.09        | 0.14        |
| vac,<br>201 | 111TC<br>(7.50)             | $R$                         | <b>0.62</b> | <b>0.84</b> | <b>0.94</b> | <b>0.85</b> | <b>0.96</b> | <b>0.88</b> | <b>0.32</b> |             | <b>0.82</b> | <b>0.76</b> | <b>0.89</b> |
|             |                             | $\max \Delta G_y  x$        | 0.37        | 0.36        | 0.24        | 0.35        | 0.22        | 0.32        | 0.50        | –           | 0.36        | 0.43        | 0.30        |
|             |                             | $\text{ave } \Delta G_y  x$ | 0.28        | 0.17        | 0.10        | 0.14        | 0.09        | 0.15        | 0.31        |             | 0.17        | 0.18        | 0.15        |
| vac,<br>201 | 111TM<br>(6.92)             | $R$                         | <b>0.34</b> | <b>0.75</b> | <b>0.93</b> | <b>0.88</b> | <b>0.90</b> | <b>0.78</b> | <b>0.19</b> | <b>0.86</b> |             | <b>0.78</b> | <b>0.76</b> |
|             |                             | $\max \Delta G_y  x$        | 0.34        | 0.22        | 0.14        | 0.18        | 0.17        | 0.22        | 0.35        | 0.20        | –           | 0.22        | 0.24        |
|             |                             | $\text{ave } \Delta G_y  x$ | 0.19        | 0.13        | 0.07        | 0.08        | 0.08        | 0.12        | 0.20        | 0.10        |             | 0.13        | 0.12        |
| vac,<br>201 | 111TM<br>(6.92)             | $R$                         | <b>0.54</b> | <b>0.91</b> | <b>0.99</b> | <b>0.99</b> | <b>0.97</b> | <b>0.91</b> | <b>0.49</b> | <b>0.95</b> | <b>0.98</b> |             | <b>0.89</b> |
|             |                             | $\max \Delta G_y  x$        | 0.40        | 0.16        | 0.07        | 0.05        | 0.11        | 0.16        | 0.44        | 0.14        | 0.10        | –           | 0.19        |
|             |                             | $\text{ave } \Delta G_y  x$ | 0.20        | 0.11        | 0.04        | 0.02        | 0.06        | 0.11        | 0.22        | 0.08        | 0.05        |             | 0.11        |

|             | Site<br>( $C\bar{N}$ ) | Parameters <sup>a</sup>     | MS, 38      |             | MS, 79      |             |             | MS, 201     |             |             |             |             |      |
|-------------|------------------------|-----------------------------|-------------|-------------|-------------|-------------|-------------|-------------|-------------|-------------|-------------|-------------|------|
|             |                        |                             | 111         | kink        | 111E        | 111T        | kink        | 100E        | 100T        | 111E        | 111TC       | 111TM       | kink |
| vac,<br>201 | kink<br>(4.08)         | $R$                         | <b>0.67</b> | <b>0.82</b> | <b>0.90</b> | <b>0.78</b> | <b>0.93</b> | <b>0.87</b> | <b>0.35</b> | <b>0.92</b> | <b>0.76</b> | <b>0.71</b> |      |
|             |                        | $\max \Delta G_y  x$        | 0.45        | 0.49        | 0.34        | 0.47        | 0.32        | 0.44        | 0.64        | 0.34        | 0.48        | 0.56        | –    |
|             |                        | $\text{ave } \Delta G_y  x$ | 0.32        | 0.20        | 0.17        | 0.22        | 0.13        | 0.17        | 0.36        | 0.14        | 0.25        | 0.25        |      |

|                 | Site<br>( $C\bar{N}$ )      | Parameters <sup>a</sup>     | vac, 38     |             | vac, 79     |             |             | vac, 201    |             |             |             |             |             |
|-----------------|-----------------------------|-----------------------------|-------------|-------------|-------------|-------------|-------------|-------------|-------------|-------------|-------------|-------------|-------------|
|                 |                             |                             | 111         | kink        | 111E        | 111T        | kink        | 100E        | 100T        | 111E        | 111TC       | 111TM       | kink        |
| MS,<br>38       | 111<br>(6.00)               | $R$                         |             | <b>0.93</b> | <b>0.56</b> | <b>0.37</b> | <b>0.64</b> | <b>0.08</b> | <b>0.80</b> | <b>0.62</b> | <b>0.34</b> | <b>0.54</b> | <b>0.67</b> |
|                 |                             | $\max \Delta G_y  x$        | –           | 0.13        | 0.38        | 0.39        | 0.33        | 0.27        | 0.20        | 0.35        | 0.42        | 0.37        | 0.33        |
|                 |                             | $\text{ave } \Delta G_y  x$ |             | 0.08        | 0.18        | 0.20        | 0.17        | 0.14        | 0.16        | 0.17        | 0.19        | 0.20        | 0.16        |
|                 | kink<br>(4.00)              | $R$                         | <b>0.61</b> |             | <b>0.81</b> | <b>0.72</b> | <b>0.79</b> | <b>0.52</b> | <b>0.80</b> | <b>0.84</b> | <b>0.75</b> | <b>0.91</b> | <b>0.82</b> |
|                 |                             | $\max \Delta G_y  x$        | 0.36        | –           | 0.35        | 0.32        | 0.38        | 0.32        | 0.27        | 0.33        | 0.33        | 0.20        | 0.36        |
|                 |                             | $\text{ave } \Delta G_y  x$ | 0.19        |             | 0.17        | 0.21        | 0.18        | 0.16        | 0.14        | 0.16        | 0.20        | 0.15        | 0.16        |
| MS,<br>79       | 111E<br>(5.00)              | $R$                         | <b>0.38</b> | <b>0.81</b> |             | <b>0.90</b> | <b>0.88</b> | <b>0.88</b> | <b>0.50</b> | <b>0.94</b> | <b>0.93</b> | <b>0.99</b> | <b>0.90</b> |
|                 |                             | $\max \Delta G_y  x$        | 0.36        | 0.36        | –           | 0.23        | 0.26        | 0.18        | 0.31        | 0.21        | 0.21        | 0.09        | 0.24        |
|                 |                             | $\text{ave } \Delta G_y  x$ | 0.18        | 0.15        |             | 0.12        | 0.12        | 0.10        | 0.15        | 0.09        | 0.11        | 0.05        | 0.11        |
|                 | 111T<br>(6.67)              | $R$                         | <b>0.61</b> | <b>0.73</b> | <b>0.83</b> |             | <b>0.76</b> | <b>0.82</b> | <b>0.72</b> | <b>0.85</b> | <b>0.88</b> | <b>0.99</b> | <b>0.78</b> |
|                 |                             | $\max \Delta G_y  x$        | 0.16        | 0.30        | 0.23        | –           | 0.24        | 0.19        | 0.13        | 0.22        | 0.19        | 0.04        | 0.23        |
|                 |                             | $\text{ave } \Delta G_y  x$ | 0.08        | 0.13        | 0.10        |             | 0.11        | 0.10        | 0.07        | 0.09        | 0.09        | 0.02        | 0.10        |
| kink<br>(4.08)  | $R$                         | <b>0.42</b>                 | <b>0.87</b> | <b>0.94</b> | <b>0.87</b> |             | <b>0.89</b> | <b>0.51</b> | <b>0.96</b> | <b>0.90</b> | <b>0.97</b> | <b>0.93</b> |             |
|                 | $\max \Delta G_y  x$        | 0.39                        | 0.31        | 0.22        | 0.28        | –           | 0.16        | 0.34        | 0.19        | 0.26        | 0.14        | 0.22        |             |
|                 | $\text{ave } \Delta G_y  x$ | 0.19                        | 0.12        | 0.09        | 0.14        |             | 0.08        | 0.18        | 0.08        | 0.12        | 0.08        | 0.09        |             |
| MS,<br>201      | 100E<br>(5.17)              | $R$                         | <b>0.57</b> | <b>0.93</b> | <b>0.85</b> | <b>0.74</b> | <b>0.84</b> |             | <b>0.73</b> | <b>0.88</b> | <b>0.78</b> | <b>0.91</b> | <b>0.87</b> |
|                 |                             | $\max \Delta G_y  x$        | 0.39        | 0.21        | 0.30        | 0.34        | 0.33        | –           | 0.31        | 0.28        | 0.33        | 0.21        | 0.31        |
|                 |                             | $\text{ave } \Delta G_y  x$ | 0.19        | 0.10        | 0.15        | 0.20        | 0.16        | 0.15        | 0.15        | 0.14        | 0.18        | 0.15        | 0.14        |
|                 | 100T<br>(6.33)              | $R$                         | <b>0.60</b> | <b>0.67</b> | <b>0.29</b> | <b>0.12</b> | <b>0.28</b> | <b>0.39</b> |             | <b>0.32</b> | <b>0.19</b> | <b>0.49</b> | <b>0.35</b> |
|                 |                             | $\max \Delta G_y  x$        | 0.31        | 0.25        | 0.28        | 0.27        | 0.29        | 0.30        | –           | 0.28        | 0.26        | 0.20        | 0.29        |
|                 |                             | $\text{ave } \Delta G_y  x$ | 0.15        | 0.11        | 0.17        | 0.19        | 0.17        | 0.15        |             | 0.17        | 0.18        | 0.16        | 0.16        |
|                 | 111E<br>(5.00)              | $R$                         | <b>0.50</b> | <b>0.90</b> | <b>0.92</b> | <b>0.83</b> | <b>0.90</b> | <b>0.85</b> | <b>0.57</b> |             | <b>0.86</b> | <b>0.95</b> | <b>0.92</b> |
|                 |                             | $\max \Delta G_y  x$        | 0.33        | 0.23        | 0.20        | 0.25        | 0.22        | 0.15        | 0.29        | –           | 0.25        | 0.16        | 0.20        |
|                 |                             | $\text{ave } \Delta G_y  x$ | 0.17        | 0.09        | 0.09        | 0.13        | 0.10        | 0.08        | 0.16        |             | 0.12        | 0.09        | 0.08        |
|                 | 111TC<br>(7.50)             | $R$                         | <b>0.32</b> | <b>0.73</b> | <b>0.81</b> | <b>0.80</b> | <b>0.72</b> | <b>0.61</b> | <b>0.73</b> | <b>0.82</b> |             | <b>0.98</b> | <b>0.76</b> |
|                 |                             | $\max \Delta G_y  x$        | 0.23        | 0.29        | 0.27        | 0.27        | 0.27        | 0.23        | 0.16        | 0.25        | –           | 0.10        | 0.26        |
|                 |                             | $\text{ave } \Delta G_y  x$ | 0.13        | 0.15        | 0.11        | 0.12        | 0.15        | 0.15        | 0.11        | 0.12        |             | 0.05        | 0.14        |
| 111TM<br>(6.92) | $R$                         | <b>0.56</b>                 | <b>0.75</b> | <b>0.74</b> | <b>0.77</b> | <b>0.67</b> | <b>0.55</b> | <b>0.89</b> | <b>0.76</b> | <b>0.78</b> |             | <b>0.71</b> |             |
|                 | $\max \Delta G_y  x$        | 0.19                        | 0.23        | 0.27        | 0.21        | 0.28        | 0.24        | 0.10        | 0.26        | 0.23        | –           | 0.27        |             |
|                 | $\text{ave } \Delta G_y  x$ | 0.09                        | 0.12        | 0.11        | 0.12        | 0.12        | 0.12        | 0.06        | 0.11        | 0.12        |             | 0.11        |             |
| kink<br>(4.08)  | $R$                         | <b>0.63</b>                 | <b>0.94</b> | <b>0.85</b> | <b>0.75</b> | <b>0.85</b> | <b>0.65</b> | <b>0.70</b> | <b>0.89</b> | <b>0.76</b> | <b>0.89</b> |             |             |
|                 | $\max \Delta G_y  x$        | 0.33                        | 0.18        | 0.25        | 0.29        | 0.28        | 0.22        | 0.27        | 0.23        | 0.32        | 0.22        | –           |             |
|                 | $\text{ave } \Delta G_y  x$ | 0.17                        | 0.08        | 0.13        | 0.17        | 0.13        | 0.11        | 0.16        | 0.11        | 0.15        | 0.13        |             |             |

|                             | Site<br>( $C\bar{N}$ )      | Parameters <sup>a</sup>     | vac, 38     |             | vac, 79     |             |             | vac, 201    |             |             |             |             |             |
|-----------------------------|-----------------------------|-----------------------------|-------------|-------------|-------------|-------------|-------------|-------------|-------------|-------------|-------------|-------------|-------------|
|                             |                             |                             | 111         | kink        | 111E        | 111T        | kink        | 100E        | 100T        | 111E        | 111TC       | 111TM       | kink        |
| vac,<br>38                  | 111<br>(6.00)               | $R$                         |             | <b>0.60</b> | <b>0.06</b> | <b>0.22</b> | <b>0.19</b> | <b>0.06</b> | <b>0.75</b> | <b>0.18</b> | <b>0.23</b> | <b>0.54</b> | <b>0.21</b> |
|                             |                             | $\max \Delta G_y  x$        | –           | 0.24        | 0.39        | 0.36        | 0.37        | 0.36        | 0.23        | 0.38        | 0.38        | 0.25        | 0.37        |
|                             |                             | $\text{ave } \Delta G_y  x$ |             | 0.17        | 0.20        | 0.18        | 0.19        | 0.24        | 0.11        | 0.19        | 0.19        | 0.16        | 0.19        |
|                             | kink<br>(4.00)              | $R$                         | <b>0.60</b> |             | <b>0.81</b> | <b>0.56</b> | <b>0.86</b> | <b>0.29</b> | <b>0.62</b> | <b>0.84</b> | <b>0.60</b> | <b>0.72</b> | <b>0.88</b> |
|                             |                             | $\max \Delta G_y  x$        | 0.48        | –           | 0.36        | 0.46        | 0.27        | 0.20        | 0.42        | 0.31        | 0.46        | 0.40        | 0.27        |
|                             |                             | $\text{ave } \Delta G_y  x$ | 0.24        |             | 0.18        | 0.24        | 0.16        | 0.10        | 0.26        | 0.17        | 0.22        | 0.24        | 0.14        |
| vac,<br>79                  | 111E<br>(5.00)              | $R$                         | <b>0.06</b> | <b>0.81</b> |             | <b>0.83</b> | <b>0.98</b> | <b>0.95</b> | <b>0.11</b> | <b>1.00</b> | <b>0.93</b> | <b>0.98</b> | <b>0.98</b> |
|                             |                             | $\max \Delta G_y  x$        | 0.48        | 0.30        | –           | 0.31        | 0.11        | 0.10        | 0.46        | 0.06        | 0.17        | 0.09        | 0.11        |
|                             |                             | $\text{ave } \Delta G_y  x$ | 0.24        | 0.18        |             | 0.16        | 0.06        | 0.05        | 0.23        | 0.03        | 0.11        | 0.07        | 0.04        |
|                             | 111T<br>(6.67)              | $R$                         | <b>0.22</b> | <b>0.56</b> | <b>0.83</b> |             | <b>0.77</b> | <b>0.99</b> | <b>0.11</b> | <b>0.85</b> | <b>0.92</b> | <b>0.93</b> | <b>0.76</b> |
|                             |                             | $\max \Delta G_y  x$        | 0.15        | 0.35        | 0.19        | –           | 0.26        | 0.06        | 0.14        | 0.19        | 0.15        | 0.16        | 0.25        |
|                             |                             | $\text{ave } \Delta G_y  x$ | 0.09        | 0.15        | 0.12        |             | 0.14        | 0.03        | 0.10        | 0.12        | 0.09        | 0.08        | 0.14        |
| kink<br>(4.08)              | $R$                         | <b>0.19</b>                 | <b>0.86</b> | <b>0.98</b> | <b>0.77</b> |             | <b>0.93</b> | <b>0.13</b> | <b>0.99</b> | <b>0.85</b> | <b>0.93</b> | <b>1.00</b> |             |
|                             | $\max \Delta G_y  x$        | 0.67                        | 0.34        | 0.15        | 0.48        | –           | 0.14        | 0.67        | 0.11        | 0.35        | 0.29        | 0.07        |             |
|                             | $\text{ave } \Delta G_y  x$ | 0.34                        | 0.22        | 0.09        | 0.27        |             | 0.07        | 0.37        | 0.07        | 0.22        | 0.15        | 0.03        |             |
| vac,<br>201                 | 100E<br>(5.17)              | $R$                         | <b>0.06</b> | <b>0.29</b> | <b>0.95</b> | <b>0.99</b> | <b>0.93</b> |             | <b>0.73</b> | <b>0.99</b> | <b>0.89</b> | <b>0.94</b> | <b>0.96</b> |
|                             |                             | $\max \Delta G_y  x$        | 0.15        | 0.28        | 0.09        | 0.05        | 0.11        | –           | 0.10        | 0.04        | 0.14        | 0.10        | 0.09        |
|                             |                             | $\text{ave } \Delta G_y  x$ | 0.10        | 0.18        | 0.06        | 0.03        | 0.06        | 0.15        | 0.06        | 0.02        | 0.07        | 0.06        | 0.04        |
|                             | 100T<br>(6.33)              | $R$                         | <b>0.75</b> | <b>0.62</b> | <b>0.11</b> | <b>0.11</b> | <b>0.13</b> | <b>0.73</b> |             | <b>0.17</b> | <b>0.08</b> | <b>0.99</b> | <b>0.20</b> |
|                             |                             | $\max \Delta G_y  x$        | 0.25        | 0.30        | 0.29        | 0.26        | 0.30        | 0.22        | –           | 0.31        | 0.24        | 0.03        | 0.31        |
|                             |                             | $\text{ave } \Delta G_y  x$ | 0.13        | 0.15        | 0.22        | 0.22        | 0.21        | 0.15        |             | 0.21        | 0.22        | 0.02        | 0.21        |
|                             | 111E<br>(5.00)              | $R$                         | <b>0.18</b> | <b>0.84</b> | <b>1.00</b> | <b>0.85</b> | <b>0.99</b> | <b>0.99</b> | <b>0.17</b> |             | <b>0.92</b> | <b>0.97</b> | <b>0.99</b> |
|                             |                             | $\max \Delta G_y  x$        | 0.49        | 0.27        | 0.06        | 0.33        | 0.10        | 0.04        | 0.48        | –           | 0.23        | 0.15        | 0.09        |
| $\text{ave } \Delta G_y  x$ |                             | 0.25                        | 0.18        | 0.03        | 0.18        | 0.05        | 0.02        | 0.25        |             | 0.12        | 0.08        | 0.05        |             |
| 111TC<br>(7.50)             | $R$                         | <b>0.23</b>                 | <b>0.60</b> | <b>0.93</b> | <b>0.92</b> | <b>0.85</b> | <b>0.89</b> | <b>0.08</b> | <b>0.92</b> |             | <b>0.99</b> | <b>0.86</b> |             |
|                             | $\max \Delta G_y  x$        | 0.22                        | 0.28        | 0.11        | 0.12        | 0.18        | 0.13        | 0.21        | 0.15        | –           | 0.06        | 0.17        |             |
|                             | $\text{ave } \Delta G_y  x$ | 0.11                        | 0.14        | 0.07        | 0.08        | 0.09        | 0.07        | 0.12        | 0.07        |             | 0.03        | 0.09        |             |

| Site<br>( $\bar{CN}$ ) | Parameters <sup>a</sup>   | vac, 38     |             | vac, 79     |             |             | vac, 201    |             |             |             |             |      |             |
|------------------------|---------------------------|-------------|-------------|-------------|-------------|-------------|-------------|-------------|-------------|-------------|-------------|------|-------------|
|                        |                           | 111         | kink        | 111E        | 111T        | kink        | 100E        | 100T        | 111E        | 111TC       | 111TM       | kink |             |
| 111TM<br>(6.92)        | <i>R</i>                  | <b>0.54</b> | <b>0.72</b> | <b>0.98</b> | <b>0.93</b> | <b>0.93</b> | <b>0.94</b> | <b>0.99</b> | <b>0.97</b> | <b>0.99</b> |             |      | <b>0.93</b> |
|                        | <i>max</i> $\Delta G_y x$ | 0.17        | 0.32        | 0.07        | 0.16        | 0.17        | 0.10        | 0.03        | 0.11        | 0.07        | –           |      | 0.15        |
|                        | <i>ave</i> $\Delta G_y x$ | 0.11        | 0.16        | 0.06        | 0.08        | 0.09        | 0.07        | 0.02        | 0.06        | 0.04        |             |      | 0.10        |
| kink<br>(4.08)         | <i>R</i>                  | <b>0.21</b> | <b>0.88</b> | <b>0.98</b> | <b>0.76</b> | <b>1.00</b> | <b>0.96</b> | <b>0.20</b> | <b>0.99</b> | <b>0.86</b> | <b>0.93</b> |      |             |
|                        | <i>max</i> $\Delta G_y x$ | 0.67        | 0.29        | 0.14        | 0.49        | 0.06        | 0.09        | 0.65        | 0.10        | 0.33        | 0.26        | –    |             |
|                        | <i>ave</i> $\Delta G_y x$ | 0.33        | 0.19        | 0.06        | 0.27        | 0.03        | 0.04        | 0.33        | 0.06        | 0.20        | 0.16        |      |             |

*a*: All  $\Delta G_y$  are in eV.

### S.5. Statistical treatment of bivariate normal distributions

We modeled formation energies for each metal  $M$  using bivariate normal distributions. These distributions are described in Equation S.10, with  $x = \Delta G_{f,MS}$  and  $y = \Delta G_{f,vac}$ :

$$P_M(x, y) = \frac{1}{2\pi\sigma_{M1}\sigma_{M2}} \exp\left(-\frac{(\cos\theta_M(x - \bar{x}_M) + \sin\theta_M(y - \bar{y}_M))^2}{2\sigma_{M1}^2} - \frac{(-\sin\theta_M(x - \bar{x}_M) + \cos\theta_M(y - \bar{y}_M))^2}{2\sigma_{M2}^2}\right) \quad (\text{S.10})$$

where  $\bar{x}_M$  and  $\bar{y}_M$  are the mean formation energies for each metal,  $\theta_M$  is the angle along which the first component of the distribution is oriented (perpendicular to the second component), and  $\sigma_{M1}$  and  $\sigma_{M2}$  are the standard deviations of respective components.  $\theta_M$  is defined using the net orientation of the known  $x$ ,  $y$  of the metal, so:

$$\theta_M = \tan^{-1}\left(2\frac{\overline{(x - \bar{x})(y - \bar{y})}}{\overline{(x - \bar{x})^2} - \overline{(y - \bar{y})^2}}\right) \quad (\text{S.11})$$

Subsequently,  $\sigma_{M1}$  and  $\sigma_{M2}$  are optimized such that  $\prod_{site_M} P_M(x_{site_M}, y_{site_M})$  is maximized, ensuring the bivariate normal distribution is closest to the observed distribution of formation energies.

The equally weighted average of resulting  $P_M$  for Au, Ir, Pd, and Pt is compared to the linear fit of all  $\bar{y}_M$  with respect to  $\bar{x}_M$ . We obtained the correlation coefficient of the distributions with respect to this linear fit by analytically evaluating the expression in Equation S.12:

$$R_{dist} = \sqrt{1 - \frac{\sum_M \iint_{-\infty}^{\infty} (y - ax - b)^2 P_M(x, y) dx dy}{\sum_M \iint_{-\infty}^{\infty} (y - \bar{y})^2 P_M(x, y) dx dy}} \quad (\text{S.12})$$

Here,  $ax + b$  is the equation corresponding to the linear fit of  $\bar{y}_M$  with respect to  $\bar{x}_M$ , and  $\bar{y}$  is the average across all  $\bar{y}_M$ . The corresponding MAE is calculated by numerically evaluating the integral in Equation S.13 using the 2D adaptive quadrature method implemented in GNU Octave 7.2.0:<sup>9</sup>



$$MAE = \sum_M \iint_{-\infty}^{\infty} |y - ax - b| P_M(x, y) dx dy \quad (S.13)$$

The  $P_M$  parameters and corresponding MAE are listed below in Table S.6.

**Table S.6.** Bivariate normal distribution parameters.

| <b>Metal</b> | $\bar{x}_M$ (eV) | $\bar{y}_M$ (eV) | $\theta_M$ (°) | $\sigma_1$ (eV) | $\sigma_2$ (eV) | <b>MAE</b> (eV) |
|--------------|------------------|------------------|----------------|-----------------|-----------------|-----------------|
| Ag           | 0.074            | 1.063            | 31.1           | 0.194           | 0.052           | 0.32            |
| Au           | 0.574            | 1.328            | 42.8           | 0.254           | 0.123           | 0.15            |
| Ir           | -0.305           | 0.356            | -35.3          | 0.065           | 0.303           | 0.09            |
| Pd           | 0.231            | 0.904            | 39.8           | 0.188           | 0.076           | 0.09            |
| Pt           | 0.178            | 0.806            | 42.2           | 0.311           | 0.128           | 0.16            |

## S.6. Solvation energy statistics

**Table S.7.** Parameters for linear regressions of solvation energies between different metals and adsorption site coordination numbers.

|                                         | Metal y | Parameters <sup>a</sup> | $\overline{CN}$ | Ag           | Au           | Ir           | Pd           | Pt           |
|-----------------------------------------|---------|-------------------------|-----------------|--------------|--------------|--------------|--------------|--------------|
| <b>Excluding 38–111, 201–100T</b>       | Ag      | a                       | <b>0.02</b>     |              |              |              |              |              |
|                                         |         | b                       | -1.05           | –            | <b>0.54</b>  | <b>-0.14</b> | <b>0.02</b>  | <b>0.90</b>  |
|                                         | Au      | a                       | <b>-0.05</b>    | <b>0.98</b>  |              |              |              |              |
|                                         |         | b                       | -0.44           | 0.26         | –            | <b>0.33</b>  | <b>-0.58</b> | <b>1.17</b>  |
|                                         | Ir      | a                       | <b>-0.10</b>    | <b>-0.25</b> | <b>0.30</b>  |              |              |              |
|                                         |         | b                       | -0.07           | -0.85        | -0.40        | –            | <b>-0.25</b> | <b>0.64</b>  |
|                                         | Pd      | a                       | <b>0.02</b>     | <b>0.00</b>  | <b>-0.06</b> | <b>-0.02</b> |              |              |
|                                         |         | b                       | -0.76           | -0.67        | -0.72        | -0.70        | –            | <b>0.21</b>  |
|                                         | Pt      | a                       | <b>0.00</b>     | <b>0.40</b>  | <b>0.26</b>  | <b>0.14</b>  | <b>0.44</b>  |              |
|                                         |         | b                       | -0.59           | -0.23        | -0.43        | -0.54        | -0.32        | –            |
| <b>Excluding 38 sites, 201–100T</b>     | Ag      | a                       | <b>0.06</b>     |              |              |              |              |              |
|                                         |         | b                       | -1.30           | –            | <b>-0.02</b> | <b>-0.45</b> | <b>0.23</b>  | <b>0.18</b>  |
|                                         | Au      | a                       | <b>-0.01</b>    | <b>-0.02</b> |              |              |              |              |
|                                         |         | b                       | -0.72           | -0.76        | –            | <b>-0.05</b> | <b>-0.22</b> | <b>-0.08</b> |
|                                         | Ir      | a                       | <b>-0.10</b>    | <b>-2.09</b> | <b>-0.19</b> |              |              |              |
|                                         |         | b                       | -0.09           | -2.74        | -0.78        | –            | <b>-0.13</b> | <b>-0.04</b> |
|                                         | Pd      | a                       | <b>0.02</b>     | <b>0.14</b>  | <b>-0.10</b> | <b>-0.02</b> |              |              |
|                                         |         | b                       | -0.76           | -0.53        | -0.75        | -0.69        | –            | <b>0.46</b>  |
|                                         | Pt      | a                       | <b>0.01</b>     | <b>0.14</b>  | <b>-0.05</b> | <b>0.00</b>  | <b>0.57</b>  |              |
|                                         |         | b                       | -0.71           | -0.49        | -0.67        | -0.64        | -0.25        | –            |
| <b>Excluding 38, 79 sites, 201–100T</b> | Ag      | a                       | <b>0.04</b>     |              |              |              |              |              |
|                                         |         | b                       | -1.25           | –            | <b>0.66</b>  | <b>-0.40</b> | <b>0.07</b>  | <b>0.34</b>  |
|                                         | Au      | a                       | <b>0.02</b>     | <b>0.77</b>  |              |              |              |              |
|                                         |         | b                       | -0.93           | 0.01         | –            | <b>-0.23</b> | <b>1.26</b>  | <b>0.84</b>  |
|                                         | Ir      | a                       | <b>-0.10</b>    | <b>-2.45</b> | <b>-0.99</b> |              |              |              |
|                                         |         | b                       | -0.05           | -3.08        | -1.39        | –            | <b>0.56</b>  | <b>-0.73</b> |
|                                         | Pd      | a                       | <b>0.00</b>     | <b>0.03</b>  | <b>0.36</b>  | <b>0.03</b>  |              |              |
|                                         |         | b                       | -0.66           | -0.61        | -0.36        | -0.63        | –            | <b>0.55</b>  |
|                                         | Pt      | a                       | <b>0.01</b>     | <b>0.36</b>  | <b>0.63</b>  | <b>-0.07</b> | <b>1.45</b>  |              |
|                                         |         | b                       | -0.68           | -0.24        | -0.12        | -0.68        | 0.32         | –            |

a: Parameters for linear regressions  $\overline{\Delta G}_y = a\Delta G_x + b$ , for which  $\overline{\Delta G}_y$ ,  $\Delta G_x$ ,  $a$ , and  $b$  are in eV.

**Table S.8.** Quality of linear relations between solvation energies on different metals.

|                             | Metal y | Statistics <sup>a</sup> | $\overline{CN}$ | Ag           | Au           | Ir           | Pd           | Pt          | no trend <sup>b</sup> |
|-----------------------------|---------|-------------------------|-----------------|--------------|--------------|--------------|--------------|-------------|-----------------------|
| Excluding 38–111T, 201–100T | Ag      | R                       | <b>0.16</b>     |              |              |              |              |             | –                     |
|                             |         | max $\Delta G_y x$      | 0.27            | –            | <b>0.73</b>  | <b>-0.19</b> | <b>0.01</b>  | <b>0.60</b> | 0.49                  |
|                             |         | ave $\Delta G_y x$      | 0.08            |              | 0.14         | 0.29         | 0.25         | 0.13        | 0.13                  |
|                             | Au      | R                       | <b>-0.39</b>    | <b>0.73</b>  |              |              |              |             | –                     |
|                             |         | max $\Delta G_y x$      | 0.31            | 0.19         | –            | <b>0.31</b>  | <b>-0.19</b> | <b>0.60</b> | 0.13                  |
|                             |         | ave $\Delta G_y x$      | 0.11            | 0.09         | 0.13         | 0.11         | 0.10         | 0.07        | 0.07                  |
|                             | Ir      | R                       | <b>-0.84</b>    | <b>-0.19</b> | <b>0.31</b>  |              |              |             | –                     |
|                             |         | max $\Delta G_y x$      | 0.12            | 0.22         | 0.26         | –            | 0.25         | 0.23        | 0.28                  |
|                             |         | ave $\Delta G_y x$      | 0.07            | 0.15         | 0.12         | 0.13         | 0.12         | 0.12        | 0.12                  |
|                             | Pd      | R                       | <b>0.38</b>     | <b>0.01</b>  | <b>-0.19</b> | <b>-0.08</b> |              |             | –                     |
|                             |         | max $\Delta G_y x$      | 0.07            | 0.09         | 0.09         | 0.08         | –            | 0.09        | 0.11                  |
|                             |         | ave $\Delta G_y x$      | 0.04            | 0.05         | 0.04         | 0.04         | 0.04         | 0.04        | 0.05                  |
|                             | Pt      | R                       | <b>-0.06</b>    | <b>0.60</b>  | <b>0.55</b>  | <b>0.29</b>  | <b>0.00</b>  |             | –                     |
|                             |         | max $\Delta G_y x$      | 0.13            | 0.11         | 0.14         | 0.12         | 0.14         | –           | 0.19                  |
|                             |         | ave $\Delta G_y x$      | 0.06            | 0.05         | 0.05         | 0.06         | 0.05         | 0.05        | 0.06                  |
|                             | Metal y | Statistics <sup>a</sup> | $\overline{CN}$ | Ag           | Au           | Ir           | Pd           | Pt          | no trend <sup>b</sup> |
|                             | Ag      | R                       | <b>0.91</b>     | –            | <b>-0.02</b> | <b>-0.97</b> | <b>0.18</b>  | <b>0.16</b> | –                     |

|                                  |                    |                    |              |              |              |              |              |              |                             |
|----------------------------------|--------------------|--------------------|--------------|--------------|--------------|--------------|--------------|--------------|-----------------------------|
| Excluding 38 sites, 201–100T     |                    | $max \Delta G_y x$ | 0.04         |              | 0.11         | 0.17         | 0.12         | 0.11         | 0.11                        |
|                                  |                    | $ave \Delta G_y x$ | 0.03         |              | 0.06         | 0.07         | 0.05         | 0.06         | 0.05                        |
|                                  | Au                 | $R$                | <b>-0.09</b> | <b>-0.02</b> |              | <b>-0.10</b> | <b>-0.15</b> | <b>0.16</b>  | –                           |
|                                  |                    | $max \Delta G_y x$ | 0.12         | 0.11         | –            | 0.12         | 0.12         | 0.12         | 0.13                        |
|                                  |                    | $ave \Delta G_y x$ | 0.07         | 0.07         |              | 0.08         | 0.07         | 0.07         | 0.07                        |
|                                  |                    | $R$                | <b>-0.81</b> | <b>-0.97</b> | <b>-0.10</b> |              | <b>-0.04</b> | <b>-0.01</b> | –                           |
|                                  | Ir                 | $max \Delta G_y x$ | 0.12         | 0.06         | 0.25         | –            | 0.26         | 0.26         | 0.26                        |
|                                  |                    | $ave \Delta G_y x$ | 0.08         | 0.03         | 0.12         |              | 0.12         | 0.12         | 0.12                        |
|                                  |                    | $R$                | <b>0.36</b>  | <b>0.18</b>  | <b>-0.15</b> | <b>-0.04</b> |              | <b>0.00</b>  | –                           |
|                                  |                    | $max \Delta G_y x$ | 0.07         | 0.08         | 0.09         | 0.09         | –            | 0.10         | 0.10                        |
|                                  | Pd                 | $ave \Delta G_y x$ | 0.04         | 0.05         | 0.05         | 0.04         |              | 0.03         | 0.05                        |
|                                  |                    | $R$                | <b>0.29</b>  | <b>0.16</b>  | <b>-0.06</b> | <b>-0.01</b> | <b>0.00</b>  |              | –                           |
| Pt                               | $max \Delta G_y x$ | 0.09               | 0.10         | 0.10         | 0.09         | 0.09         | –            | 0.10         |                             |
|                                  | $ave \Delta G_y x$ | 0.05               | 0.05         | 0.04         | 0.04         | 0.04         |              | 0.04         |                             |
|                                  |                    |                    | <b>CN</b>    | Ag           | Au           | Ir           | Pd           | Pt           | <i>no trend<sup>b</sup></i> |
| Excluding 38, 79 sites, 201–100T | Ag                 | $R$                | <b>0.91</b>  |              | <b>0.71</b>  | <b>-0.99</b> | <b>0.05</b>  | <b>0.35</b>  | –                           |
|                                  |                    | $max \Delta G_y x$ | 0.03         | –            | 0.07         | 0.16         | 0.09         | 0.08         | 0.49                        |
|                                  |                    | $ave \Delta G_y x$ | 0.02         |              | 0.03         | 0.09         | 0.04         | 0.05         | 0.13                        |
|                                  |                    | $R$                | <b>0.48</b>  | <b>0.71</b>  |              | <b>-0.47</b> | <b>0.67</b>  | <b>0.35</b>  | –                           |
|                                  | Au                 | $max \Delta G_y x$ | 0.09         | 0.07         | –            | 0.08         | 0.08         | 0.08         | 0.13                        |
|                                  |                    | $ave \Delta G_y x$ | 0.05         | 0.04         |              | 0.06         | 0.04         | 0.04         | 0.07                        |
|                                  |                    | $R$                | <b>-0.87</b> | <b>-0.99</b> | <b>-0.47</b> |              | <b>0.14</b>  | <b>-0.23</b> | –                           |
|                                  |                    | $max \Delta G_y x$ | 0.11         | 0.03         | 0.22         | –            | 0.22         | 0.24         | 0.28                        |
|                                  | Ir                 | $ave \Delta G_y x$ | 0.06         | 0.02         | 0.11         |              | 0.11         | 0.12         | 0.12                        |
|                                  |                    | $R$                | <b>0.15</b>  | <b>0.05</b>  | <b>0.67</b>  | <b>0.14</b>  |              | <b>0.00</b>  | –                           |
|                                  | Pd                 | $max \Delta G_y x$ | 0.06         | 0.06         | 0.04         | 0.06         | –            | 0.03         | 0.11                        |
|                                  |                    | $ave \Delta G_y x$ | 0.03         | 0.03         | 0.02         | 0.03         |              | 0.01         | 0.05                        |
|                                  | $R$                | <b>0.26</b>        | <b>0.35</b>  | <b>0.72</b>  | <b>-0.23</b> | <b>0.00</b>  |              | –            |                             |
|                                  | $max \Delta G_y x$ | 0.08               | 0.09         | 0.06         | 0.07         | 0.04         | –            | 0.19         |                             |
| Pt                               | $ave \Delta G_y x$ | 0.04               | 0.05         | 0.03         | 0.04         | 0.02         |              | 0.06         |                             |

a: All  $\Delta G_y$  are in eV.

b: Null hypothesis, in which deviations are relative to the average as opposed to linear regression.

**Table S.9.** Quality of linear relations between micro-solvated  $\text{OH}_x$  ( $x = 1,2$ ) energies on different metals.

|                                      |    |                    |             |             |             |             |             |                             |
|--------------------------------------|----|--------------------|-------------|-------------|-------------|-------------|-------------|-----------------------------|
| $\text{H}_2\text{O},$<br>$\text{MS}$ | Ag | $R$                | <b>0.22</b> | Ag          | Au          | Ir          | Pd          | <i>no trend<sup>b</sup></i> |
|                                      |    | $max \Delta G_y x$ | 0.12        | –           | <b>0.78</b> | <b>0.92</b> | <b>0.96</b> | –                           |
|                                      |    | $ave \Delta G_y x$ | 0.07        |             | 0.08        | 0.05        | 0.04        | 0.13                        |
|                                      |    | $R$                | <b>0.48</b> | <b>0.78</b> |             | <b>0.86</b> | <b>0.95</b> | –                           |
|                                      | Au | $max \Delta G_y x$ | 0.14        | 0.11        | –           | 0.10        | 0.11        | 0.17                        |
|                                      |    | $ave \Delta G_y x$ | 0.08        | 0.05        |             | 0.04        | 0.04        | 0.08                        |
|                                      |    | $R$                | <b>0.48</b> | <b>0.92</b> | <b>0.86</b> |             | <b>0.95</b> | –                           |
|                                      |    | $max \Delta G_y x$ | 0.33        | 0.19        | 0.23        | –           | 0.15        | 0.53                        |
|                                      | Ir | $ave \Delta G_y x$ | 0.21        | 0.09        | 0.12        |             | 0.06        | 0.20                        |
|                                      |    | $R$                | <b>0.26</b> | <b>0.96</b> | <b>0.83</b> | <b>0.95</b> |             | –                           |
|                                      | Pd | $max \Delta G_y x$ | 0.19        | 0.08        | 0.14        | 0.08        | –           | 0.20                        |
|                                      |    | $ave \Delta G_y x$ | 0.11        | 0.03        | 0.06        | 0.03        |             | 0.11                        |
| $\text{OH},$<br>$\text{MS}$          | Ag | $R$                | <b>0.82</b> | Ag          | Au          | Ir          | Pd          | <i>no trend<sup>b</sup></i> |
|                                      |    | $max \Delta G_y x$ | 0.18        | –           | <b>0.98</b> | <b>0.96</b> | <b>0.90</b> | –                           |
|                                      |    | $ave \Delta G_y x$ | 0.09        |             | 0.08        | 0.10        | 0.16        | 0.40                        |
|                                      |    | $R$                | <b>0.89</b> | <b>0.98</b> |             | <b>0.96</b> | <b>0.91</b> | –                           |
|                                      | Au | $max \Delta G_y x$ | 0.18        | 0.08        | –           | 0.12        | 0.19        | 0.47                        |
|                                      |    | $ave \Delta G_y x$ | 0.08        | 0.04        |             | 0.05        | 0.07        | 0.20                        |
|                                      |    | $R$                | <b>0.85</b> | <b>0.96</b> | <b>0.96</b> |             | <b>0.97</b> | –                           |
|                                      |    | $max \Delta G_y x$ | 0.35        | 0.27        | 0.22        | –           | 0.19        | 0.95                        |
|                                      | Ir | $ave \Delta G_y x$ | 0.23        | 0.10        | 0.10        |             | 0.11        | 0.42                        |
|                                      |    | $R$                | <b>0.75</b> | <b>0.90</b> | <b>0.91</b> | <b>0.97</b> |             | –                           |
|                                      | Pd | $max \Delta G_y x$ | 0.20        | 0.21        | 0.19        | 0.09        | –           | 0.42                        |
|                                      |    | $ave \Delta G_y x$ | 0.12        | 0.07        | 0.07        | 0.05        |             | 0.17                        |

a: All  $\Delta G_y$  are in eV.

b: Null hypothesis, in which deviations are relative to the average as opposed to linear regression.

**Table S.10.** Parameters for linear regressions between micro-solvated  $\text{OH}_x$  ( $x = 1,2$ ) energies on different metals.

|                               | Metal $y$         | Parameters <sup>a</sup> | $\overline{\text{CN}}$ | Ag                     | Au          | Ir          | Pd          |             |
|-------------------------------|-------------------|-------------------------|------------------------|------------------------|-------------|-------------|-------------|-------------|
| <i>H<sub>2</sub>O,<br/>MS</i> | Ag                | <i>a</i>                | <b>0.02</b>            | –                      | <b>0.67</b> | <b>0.30</b> | <b>0.63</b> |             |
|                               |                   | <i>b</i>                | 0.72                   |                        | 0.23        | 0.75        | 0.50        |             |
|                               | Au                | <i>a</i>                | <b>0.04</b>            | <b>0.91</b>            | –           | <b>0.33</b> | <b>0.63</b> |             |
|                               |                   | <i>b</i>                | 0.61                   | 0.12                   |             | 0.79        | 0.55        |             |
|                               | Ir                | <i>a</i>                | <b>0.10</b>            | <b>2.75</b>            | <b>2.23</b> | –           | <b>1.87</b> |             |
|                               |                   | <i>b</i>                | –0.38                  | –2.02                  | –1.71       |             | –0.71       |             |
|                               | Pd                | <i>a</i>                | <b>0.03</b>            | <b>1.47</b>            | <b>1.09</b> | <b>0.49</b> | –           |             |
|                               |                   | <i>b</i>                | 0.33                   | –0.70                  | –0.45       | 0.39        |             |             |
|                               |                   |                         |                        | $\overline{\text{CN}}$ | Ag          | Au          | Ir          | Pd          |
|                               | <i>OH,<br/>MS</i> | Ag                      | <i>a</i>               | <b>0.13</b>            | –           | <b>0.81</b> | <b>0.40</b> | <b>0.81</b> |
| <i>b</i>                      |                   |                         | 0.14                   |                        | –0.28       | 0.92        | 0.30        |             |
| Au                            |                   | <i>a</i>                | <b>0.17</b>            | <b>1.17</b>            | –           | <b>0.47</b> | <b>0.98</b> |             |
|                               |                   | <i>b</i>                | 0.46                   | 0.40                   |             | 1.48        | 0.73        |             |
| Ir                            |                   | <i>a</i>                | <b>0.34</b>            | <b>2.35</b>            | <b>1.95</b> | –           | <b>2.12</b> |             |
|                               |                   | <i>b</i>                | –1.98                  | –2.18                  | –2.90       |             | –1.62       |             |
| Pd                            |                   | <i>a</i>                | <b>0.14</b>            | <b>1.00</b>            | <b>0.84</b> | <b>0.44</b> | –           |             |
|                               |                   | <i>b</i>                | –0.04                  | –0.17                  | –0.49       | 0.76        |             |             |

*a*: Parameters for linear regressions  $\overline{\Delta G}_y = a\Delta G_x + b$ , for which  $\overline{\Delta G}_y$ ,  $\Delta G_x$ , *a*, and *b* are in eV.

## S.7. Bond lengths and statistics

Table S.11. Bond length statistics.

| Metal | Species              | Parameters <sup>a</sup> |              |              |              |              |              |
|-------|----------------------|-------------------------|--------------|--------------|--------------|--------------|--------------|
|       |                      |                         |              |              |              |              |              |
| Ag    | OH, vac              | mean bond length        |              |              | <b>2.119</b> | <b>0.976</b> |              |
|       |                      | max deviation           | –            | –            | 0.121        | 0.001        | –            |
|       |                      | average deviation       |              |              | 0.037        | 0.001        |              |
|       | OH, MS               | mean bond length        | <b>1.053</b> | <b>1.506</b> | <b>2.253</b> | <b>0.983</b> | <b>2.016</b> |
|       |                      | max deviation           | 0.008        | 0.035        | 0.042        | 0.003        | 0.092        |
|       |                      | average deviation       | 0.005        | 0.020        | 0.023        | 0.002        | 0.048        |
|       | H <sub>2</sub> O, MS | mean bond length        | <b>0.992</b> | <b>1.870</b> |              | <b>1.008</b> | <b>1.693</b> |
|       |                      | max deviation           | 0.003        | 0.050        | –            | 0.004        | 0.034        |
|       |                      | average deviation       | 0.001        | 0.017        |              | 0.002        | 0.020        |
| Au    | OH, vac              | mean bond length        |              |              | <b>2.094</b> | <b>0.977</b> |              |
|       |                      | max deviation           | –            | –            | 0.207        | 0.001        | –            |
|       |                      | average deviation       |              |              | 0.046        | 0.000        |              |
|       | OH, MS               | mean bond length        | <b>1.044</b> | <b>1.542</b> | <b>2.223</b> | <b>0.988</b> | <b>1.913</b> |
|       |                      | max deviation           | 0.022        | 0.066        | 0.063        | 0.003        | 0.047        |
|       |                      | average deviation       | 0.008        | 0.037        | 0.036        | 0.001        | 0.022        |
|       | H <sub>2</sub> O, MS | mean bond length        | <b>0.994</b> | <b>1.863</b> |              | <b>1.009</b> | <b>1.686</b> |
|       |                      | max deviation           | 0.006        | 0.081        | –            | 0.005        | 0.038        |
|       |                      | average deviation       | 0.001        | 0.021        |              | 0.003        | 0.019        |
| Ir    | OH, vac              | mean bond length        |              |              | <b>1.966</b> | <b>0.979</b> |              |
|       |                      | max deviation           | –            | –            | 0.046        | 0.001        | –            |
|       |                      | average deviation       |              |              | 0.030        | 0.000        |              |
|       | OH, MS               | mean bond length        | <b>1.050</b> | <b>1.547</b> | <b>2.103</b> | <b>1.002</b> | <b>1.775</b> |
|       |                      | max deviation           | 0.087        | 0.213        | 0.055        | 0.008        | 0.105        |
|       |                      | average deviation       | 0.021        | 0.085        | 0.029        | 0.003        | 0.045        |
|       | H <sub>2</sub> O, MS | mean bond length        | <b>1.002</b> | <b>1.845</b> |              | <b>1.019</b> | <b>1.640</b> |
|       |                      | max deviation           | 0.008        | 0.161        | –            | 0.010        | 0.066        |
|       |                      | average deviation       | 0.004        | 0.059        |              | 0.004        | 0.030        |
| Pd    | OH, vac              | mean bond length        |              |              | <b>1.974</b> | <b>0.979</b> |              |
|       |                      | max deviation           | –            | –            | 0.017        | 0.001        | –            |
|       |                      | average deviation       |              |              | 0.009        | 0.000        |              |
|       | OH, MS               | mean bond length        | <b>1.044</b> | <b>1.538</b> | <b>2.105</b> | <b>0.992</b> | <b>1.858</b> |
|       |                      | max deviation           | 0.013        | 0.071        | 0.018        | 0.007        | 0.108        |
|       |                      | average deviation       | 0.006        | 0.030        | 0.009        | 0.003        | 0.045        |
|       | H <sub>2</sub> O, MS | mean bond length        | <b>0.997</b> | <b>1.836</b> |              | <b>1.015</b> | <b>1.657</b> |
|       |                      | max deviation           | 0.004        | 0.101        | –            | 0.007        | 0.048        |
|       |                      | average deviation       | 0.002        | 0.031        |              | 0.003        | 0.023        |
| Pt    | OH, vac              | mean bond length        |              |              | <b>2.119</b> | <b>0.976</b> |              |
|       |                      | max deviation           | –            | –            | 0.121        | 0.001        | –            |
|       |                      | average deviation       |              |              | 0.037        | 0.001        |              |
|       | OH, MS               | mean bond length        | <b>1.053</b> | <b>1.506</b> | <b>2.253</b> | <b>0.983</b> | <b>2.016</b> |
|       |                      | max deviation           | 0.008        | 0.035        | 0.042        | 0.003        | 0.092        |
|       |                      | average deviation       | 0.005        | 0.020        | 0.023        | 0.002        | 0.048        |
|       | H <sub>2</sub> O, MS | mean bond length        | <b>0.992</b> | <b>1.870</b> |              | <b>1.008</b> | <b>1.693</b> |
|       |                      | max deviation           | 0.003        | 0.050        | –            | 0.004        | 0.034        |
|       |                      | average deviation       | 0.001        | 0.017        |              | 0.002        | 0.020        |

<sup>a</sup>: All values are in Å. Values for all metals and bond lengths are included to enable analysis of the effects different metal nanoparticles have on surface-bound water and (solvated) adsorbates. Specifically, all statistics are listed using 3 decimal places to enable a comparison of maximum and average deviations between metals and bonds.

## S.8. Excerpts from selected tables

The tables S.ME below contain the data from respective tables S.N which are discussed in the main body.

**Table S.2E.** Binding and formation energies.

| NP               | site  | Ag                 |                    |               | Au                 |                    |               | Ir                 |                   |               | Pd                 |                   |               |
|------------------|-------|--------------------|--------------------|---------------|--------------------|--------------------|---------------|--------------------|-------------------|---------------|--------------------|-------------------|---------------|
|                  |       | $\Delta G_{f,vac}$ | $\Delta G_{f,MS}$  | $\Omega_{OH}$ | $\Delta G_{f,vac}$ | $\Delta G_{f,MS}$  | $\Omega_{OH}$ | $\Delta G_{f,vac}$ | $\Delta G_{f,MS}$ | $\Omega_{OH}$ | $\Delta G_{f,vac}$ | $\Delta G_{f,MS}$ | $\Omega_{OH}$ |
| M <sub>38</sub>  | 111   | 0.55               | 0.11               | -0.45         | x                  | 0.33               | x             | 0.64               | -0.18             | -0.82         | 1.15               | 0.59              | -0.56         |
|                  | kink  | 0.46               | -0.25              | -0.71         | 0.67               | 0.34               | -0.32         | -0.21              | -0.65             | -0.44         | 0.78               | 0.10              | -0.69         |
| M <sub>79</sub>  | 111E  | 1.06               | 0.06               | -1.00         | 1.26               | 0.63               | -0.63         | 0.24               | -0.46             | -0.69         | 0.81               | 0.11              | -0.70         |
|                  | 111T  | 1.10               | 0.19               | -0.90         | 1.51               | 0.71               | -0.80         | 0.84               | -0.01             | -0.85         | 1.04               | 0.32              | -0.72         |
|                  | kink  | 1.08               | -0.02              | -1.11         | 1.17               | 0.48               | -0.69         | -0.12              | -0.60             | -0.47         | 0.84               | 0.06              | -0.77         |
| M <sub>201</sub> | 100E  | 0.99               | -0.01              | -1.00         | 1.27               | 0.51               | -0.76         | x                  | -0.48             | x             | 0.90               | 0.27              | -0.62         |
|                  | 100T  | 0.59               | 0.12               | -0.47         | x                  | 0.43 <sup>ab</sup> | x             | 0.68               | 0.12              | -0.57         | 1.10               | 0.53              | -0.57         |
|                  | 111E  | 0.99               | -0.02 <sup>a</sup> | -1.01         | 1.23               | 0.39               | -0.84         | 0.14               | -0.50             | -0.63         | 0.81               | 0.11              | -0.70         |
|                  | 111TC | 1.28               | 0.35 <sup>a</sup>  | -0.93         | 1.56               | 0.89               | -0.67         | 0.89               | 0.11              | -0.79         | 1.06               | 0.45              | -0.62         |
|                  | 111TM | x                  | 0.19 <sup>b</sup>  | x             | 1.53               | 0.69               | -0.84         | 0.72               | 0.06              | -0.66         | 1.04               | 0.39              | -0.65         |
|                  | kink  | 0.95               | -0.14              | -1.10         | 1.10               | 0.30               | -0.80         | -0.19              | -0.57             | -0.38         | 0.75               | 0.13              | -0.62         |

a: Vibrational data for 4\*H<sub>2</sub>O obtained using denser plane wave sampling, as described in S.2.

b: Vibrational data for \*OH+3\*H<sub>2</sub>O obtained using denser plane wave sampling, as described in S.2.

x: No stable configuration available for this adsorption site.

**Table S.4E.** Parameters for linear regressions of OH formation energies between different metals and adsorption site coordination numbers.

| MS  | Metal y | Parameters <sup>a</sup> | CN          | Metal x     |             |             |             |             |
|-----|---------|-------------------------|-------------|-------------|-------------|-------------|-------------|-------------|
|     |         |                         |             | Ag          | Au          | Ir          | Pd          | Pt          |
| MS  | Ag      | a                       | <b>0.12</b> | -           | <b>0.81</b> | <b>0.49</b> | <b>0.91</b> | <b>0.63</b> |
|     |         | b                       | -0.58       | -           | -0.39       | 0.22        | -0.14       | -0.04       |
|     | Au      | a                       | <b>0.13</b> | <b>1.17</b> | -           | <b>0.54</b> | <b>1.03</b> | <b>0.73</b> |
|     |         | b                       | -0.15       | 0.49        | -           | 0.74        | 0.34        | 0.45        |
|     | Ir      | a                       | <b>0.23</b> | <b>1.78</b> | <b>1.38</b> | -           | <b>1.91</b> | <b>1.22</b> |
|     |         | b                       | -1.60       | -0.44       | -1.10       | -           | -0.75       | -0.52       |
|     | Pd      | a                       | <b>0.11</b> | <b>0.77</b> | <b>0.60</b> | <b>0.44</b> | -           | <b>0.61</b> |
|     |         | b                       | -0.37       | 0.17        | -0.12       | 0.37        | -           | 0.12        |
|     | Pt      | a                       | <b>0.17</b> | <b>1.35</b> | <b>1.08</b> | <b>0.71</b> | <b>1.54</b> | -           |
|     |         | b                       | -0.79       | 0.08        | -0.44       | 0.39        | -0.18       | -           |
| vac | Ag      | a                       | <b>0.07</b> | -           | <b>0.51</b> | <b>0.19</b> | <b>0.73</b> | <b>0.48</b> |
|     |         | b                       | 0.70        | -           | 0.40        | 1.02        | 0.42        | 0.69        |
|     | Au      | a                       | <b>0.14</b> | <b>1.24</b> | -           | <b>0.41</b> | <b>1.41</b> | <b>0.80</b> |
|     |         | b                       | 0.57        | -0.02       | -           | 1.19        | 0.05        | 0.69        |
|     | Ir      | a                       | <b>0.32</b> | <b>3.14</b> | <b>2.37</b> | -           | <b>3.26</b> | <b>1.89</b> |
|     |         | b                       | -1.47       | -3.08       | -2.81       | -           | -2.60       | -1.19       |
|     | Pd      | a                       | <b>0.09</b> | <b>0.86</b> | <b>0.68</b> | <b>0.28</b> | -           | <b>0.53</b> |
|     |         | b                       | 0.39        | -0.03       | 0.00        | 0.81        | -           | 0.48        |
|     | Pt      | a                       | <b>0.16</b> | <b>1.59</b> | <b>1.12</b> | <b>0.46</b> | <b>1.54</b> | -           |
|     |         | b                       | -0.08       | -0.92       | -0.69       | 0.65        | -0.58       | -           |

a: Parameters for linear regressions  $\overline{\Delta G}_y = a\Delta G_x + b$ , for which  $\overline{\Delta G}_y$ ,  $\Delta G_x$ ,  $a$ , and  $b$  are in eV.

**Table S.5E.** Pearson  $R$  values for linear relations between formation site binding energies.

|                 | Site  | <i>MS, 38</i>  |      | <i>MS, 79</i>  |      |      | <i>MS, 201</i>  |      |      |       |       |      |
|-----------------|-------|----------------|------|----------------|------|------|-----------------|------|------|-------|-------|------|
|                 |       | 111            | kink | 111E           | 111T | kink | 100E            | 100T | 111E | 111TC | 111TM | kink |
| <i>MS, 38</i>   | 111   | x              | 0.84 | 0.65           | 0.61 | 0.71 | 0.84            | 0.79 | 0.77 | 0.60  | 0.68  | 0.86 |
|                 | kink  | 0.84           | x    | 0.94           | 0.92 | 0.95 | 1.00            | 0.75 | 0.97 | 0.94  | 0.96  | 0.99 |
| <i>MS, 79</i>   | 111E  | 0.65           | 0.94 | x              | 0.97 | 0.99 | 0.95            | 0.49 | 0.98 | 0.95  | 0.93  | 0.94 |
|                 | 111T  | 0.61           | 0.92 | 0.97           | x    | 0.96 | 0.92            | 0.50 | 0.94 | 0.96  | 0.96  | 0.91 |
|                 | kink  | 0.71           | 0.95 | 0.99           | 0.96 | x    | 0.97            | 0.52 | 1.00 | 0.93  | 0.92  | 0.97 |
| <i>MS, 201</i>  | 100E  | 0.84           | 1.00 | 0.95           | 0.92 | 0.97 | x               | 0.71 | 0.98 | 0.93  | 0.94  | 0.99 |
|                 | 100T  | 0.79           | 0.75 | 0.49           | 0.50 | 0.52 | 0.71            | x    | 0.57 | 0.64  | 0.71  | 0.68 |
|                 | 111E  | 0.77           | 0.97 | 0.98           | 0.94 | 1.00 | 0.98            | 0.57 | x    | 0.92  | 0.92  | 0.99 |
|                 | 111TC | 0.60           | 0.94 | 0.95           | 0.96 | 0.93 | 0.93            | 0.64 | 0.92 | x     | 0.98  | 0.90 |
|                 | 111TM | 0.68           | 0.96 | 0.93           | 0.96 | 0.92 | 0.94            | 0.71 | 0.92 | 0.98  | x     | 0.92 |
|                 | kink  | 0.86           | 0.99 | 0.94           | 0.91 | 0.97 | 0.99            | 0.68 | 0.99 | 0.90  | 0.92  | x    |
| <i>vac, 38</i>  | 111   | x              | 0.61 | 0.38           | 0.61 | 0.42 | 0.57            | 0.60 | 0.50 | 0.32  | 0.56  | 0.63 |
|                 | kink  | 0.93           | x    | 0.81           | 0.73 | 0.87 | 0.93            | 0.67 | 0.90 | 0.73  | 0.75  | 0.94 |
| <i>vac, 79</i>  | 111E  | 0.56           | 0.81 | x              | 0.83 | 0.94 | 0.85            | 0.29 | 0.92 | 0.81  | 0.74  | 0.85 |
|                 | 111T  | 0.37           | 0.72 | 0.90           | x    | 0.87 | 0.74            | 0.12 | 0.83 | 0.80  | 0.77  | 0.75 |
|                 | kink  | 0.64           | 0.79 | 0.88           | 0.76 | x    | 0.84            | 0.28 | 0.90 | 0.72  | 0.67  | 0.85 |
| <i>vac, 201</i> | 100E  | 0.08           | 0.52 | 0.88           | 0.82 | 0.89 | x               | 0.39 | 0.85 | 0.61  | 0.55  | 0.65 |
|                 | 100T  | 0.80           | 0.80 | 0.50           | 0.72 | 0.51 | 0.73            | x    | 0.57 | 0.73  | 0.89  | 0.70 |
|                 | 111E  | 0.62           | 0.84 | 0.94           | 0.85 | 0.96 | 0.88            | 0.32 | x    | 0.82  | 0.76  | 0.89 |
|                 | 111TC | 0.34           | 0.75 | 0.93           | 0.88 | 0.90 | 0.78            | 0.19 | 0.86 | x     | 0.78  | 0.76 |
|                 | 111TM | 0.54           | 0.91 | 0.99           | 0.99 | 0.97 | 0.91            | 0.49 | 0.95 | 0.98  | x     | 0.89 |
|                 | kink  | 0.67           | 0.82 | 0.90           | 0.78 | 0.93 | 0.87            | 0.35 | 0.92 | 0.76  | 0.71  | x    |
|                 | Site  | <i>vac, 38</i> |      | <i>vac, 79</i> |      |      | <i>vac, 201</i> |      |      |       |       |      |
|                 |       | 111            | kink | 111E           | 111  | kink | 111E            | 111  | kink | 111E  | 111   | kink |
| <i>MS, 38</i>   | 111   | x              | 0.93 | 0.56           | 0.37 | 0.64 | 0.08            | 0.80 | 0.62 | 0.34  | 0.54  | 0.67 |
|                 | kink  | 0.61           | x    | 0.81           | 0.72 | 0.79 | 0.52            | 0.80 | 0.84 | 0.75  | 0.91  | 0.82 |
| <i>MS, 79</i>   | 111E  | 0.38           | 0.81 | x              | 0.90 | 0.88 | 0.88            | 0.50 | 0.94 | 0.93  | 0.99  | 0.90 |
|                 | 111T  | 0.61           | 0.73 | 0.83           | x    | 0.76 | 0.82            | 0.72 | 0.85 | 0.88  | 0.99  | 0.78 |
|                 | kink  | 0.42           | 0.87 | 0.94           | 0.87 | x    | 0.89            | 0.51 | 0.96 | 0.90  | 0.97  | 0.93 |
| <i>MS, 201</i>  | 100E  | 0.57           | 0.93 | 0.85           | 0.74 | 0.84 | x               | 0.73 | 0.88 | 0.78  | 0.91  | 0.87 |
|                 | 100T  | 0.60           | 0.67 | 0.29           | 0.12 | 0.28 | 0.39            | x    | 0.32 | 0.19  | 0.49  | 0.35 |
|                 | 111E  | 0.50           | 0.90 | 0.92           | 0.83 | 0.90 | 0.85            | 0.57 | x    | 0.86  | 0.95  | 0.92 |
|                 | 111TC | 0.32           | 0.73 | 0.81           | 0.80 | 0.72 | 0.61            | 0.73 | 0.82 | x     | 0.98  | 0.76 |
|                 | 111TM | 0.56           | 0.75 | 0.74           | 0.77 | 0.67 | 0.55            | 0.89 | 0.76 | 0.78  | x     | 0.71 |
|                 | kink  | 0.63           | 0.94 | 0.85           | 0.75 | 0.85 | 0.65            | 0.70 | 0.89 | 0.76  | 0.89  | x    |
| <i>vac, 38</i>  | 111   | x              | 0.60 | 0.06           | 0.22 | 0.19 | 0.06            | 0.75 | 0.18 | 0.23  | 0.54  | 0.21 |
|                 | kink  | 0.60           | x    | 0.81           | 0.56 | 0.86 | 0.29            | 0.62 | 0.84 | 0.60  | 0.72  | 0.88 |
| <i>vac, 79</i>  | 111E  | 0.06           | 0.81 | x              | 0.83 | 0.98 | 0.95            | 0.11 | 1.00 | 0.93  | 0.98  | 0.98 |
|                 | 111T  | 0.22           | 0.56 | 0.83           | x    | 0.77 | 0.99            | 0.11 | 0.85 | 0.92  | 0.93  | 0.76 |
|                 | kink  | 0.19           | 0.86 | 0.98           | 0.77 | x    | 0.93            | 0.13 | 0.99 | 0.85  | 0.93  | 1.00 |
| <i>vac, 201</i> | 100E  | 0.06           | 0.29 | 0.95           | 0.99 | 0.93 | x               | 0.73 | 0.99 | 0.89  | 0.94  | 0.96 |
|                 | 100T  | 0.75           | 0.62 | 0.11           | 0.11 | 0.13 | 0.73            | x    | 0.17 | 0.08  | 0.99  | 0.20 |
|                 | 111E  | 0.18           | 0.84 | 1.00           | 0.85 | 0.99 | 0.99            | 0.17 | x    | 0.92  | 0.97  | 0.99 |
|                 | 111TC | 0.23           | 0.60 | 0.93           | 0.92 | 0.85 | 0.89            | 0.08 | 0.92 | x     | 0.99  | 0.86 |
|                 | 111TM | 0.54           | 0.72 | 0.98           | 0.93 | 0.93 | 0.94            | 0.99 | 0.97 | 0.99  | x     | 0.93 |
|                 | kink  | 0.21           | 0.88 | 0.98           | 0.76 | 1.00 | 0.96            | 0.20 | 0.99 | 0.86  | 0.93  | x    |

**Table S.6E.** Parameters for linear regressions of solvation energies between different metals and adsorption site coordination numbers.

| Metal $y$ | Parameters <sup>a</sup> | $\overline{CN}$ | Ag           | Au           | Ir           | Pd           | Pt           |
|-----------|-------------------------|-----------------|--------------|--------------|--------------|--------------|--------------|
| Ag        | $a$                     | <b>0.06</b>     | –            | <b>-0.02</b> | <b>-0.45</b> | <b>0.23</b>  | <b>0.18</b>  |
|           | $b$                     | -1.30           | –            | -1.02        | -1.29        | -0.85        | -0.89        |
| Au        | $a$                     | <b>-0.01</b>    | <b>-0.02</b> | –            | <b>-0.05</b> | <b>-0.22</b> | <b>-0.08</b> |
|           | $b$                     | -0.72           | -0.76        | –            | -0.79        | -0.90        | -0.81        |
| Ir        | $a$                     | <b>-0.10</b>    | <b>-2.09</b> | <b>-0.19</b> | –            | <b>-0.13</b> | <b>-0.04</b> |
|           | $b$                     | -0.09           | -2.74        | -0.78        | –            | -0.73        | -0.66        |
| Pd        | $a$                     | <b>0.02</b>     | <b>0.14</b>  | <b>-0.10</b> | <b>-0.02</b> | –            | <b>0.46</b>  |
|           | $b$                     | -0.76           | -0.53        | -0.75        | -0.69        | –            | -0.38        |
| Pt        | $a$                     | <b>0.01</b>     | <b>0.14</b>  | <b>-0.05</b> | <b>0.00</b>  | <b>0.57</b>  | –            |
|           | $b$                     | -0.71           | -0.49        | -0.67        | -0.64        | -0.25        | –            |

$a$ : Parameters for linear regressions  $\overline{\Delta G_y} = a\overline{\Delta G_x} + b$ , for which  $\overline{\Delta G_y}$ ,  $\Delta G_x$ ,  $a$ , and  $b$  are in eV.

**Table S.7E.** Quality of linear relations between solvation energies on different metals.

|                                    | Metal $y$ | Statistics <sup>a</sup>    | $\overline{CN}$ | Ag           | Au           | Ir           | Pd           | Pt           | <i>no trend</i> <sup>b</sup> |
|------------------------------------|-----------|----------------------------|-----------------|--------------|--------------|--------------|--------------|--------------|------------------------------|
| Excluding<br>38 sites,<br>201–100T | Ag        | $R$                        | <b>0.91</b>     | –            | <b>-0.02</b> | <b>-0.97</b> | <b>0.18</b>  | <b>0.16</b>  | –                            |
|                                    |           | $\max \Delta G_y x$        | 0.04            | –            | 0.11         | 0.17         | 0.12         | 0.11         | 0.11                         |
|                                    |           | $\text{ave } \Delta G_y x$ | 0.03            | –            | 0.06         | 0.07         | 0.05         | 0.06         | 0.05                         |
|                                    | Au        | $R$                        | <b>-0.09</b>    | <b>-0.02</b> | –            | <b>-0.10</b> | <b>-0.15</b> | <b>0.16</b>  | –                            |
|                                    |           | $\max \Delta G_y x$        | 0.12            | 0.11         | –            | 0.12         | 0.12         | 0.12         | 0.13                         |
|                                    |           | $\text{ave } \Delta G_y x$ | 0.07            | 0.07         | –            | 0.08         | 0.07         | 0.07         | 0.07                         |
|                                    | Ir        | $R$                        | <b>-0.81</b>    | <b>-0.97</b> | <b>-0.10</b> | –            | <b>-0.04</b> | <b>-0.01</b> | –                            |
|                                    |           | $\max \Delta G_y x$        | 0.12            | 0.06         | 0.25         | –            | 0.26         | 0.26         | 0.26                         |
|                                    |           | $\text{ave } \Delta G_y x$ | 0.08            | 0.03         | 0.12         | –            | 0.12         | 0.12         | 0.12                         |
|                                    | Pd        | $R$                        | <b>0.36</b>     | <b>0.18</b>  | <b>-0.15</b> | <b>-0.04</b> | –            | <b>0.00</b>  | –                            |
|                                    |           | $\max \Delta G_y x$        | 0.07            | 0.08         | 0.09         | 0.09         | –            | 0.10         | 0.10                         |
|                                    |           | $\text{ave } \Delta G_y x$ | 0.04            | 0.05         | 0.05         | 0.04         | –            | 0.03         | 0.05                         |
|                                    | Pt        | $R$                        | <b>0.29</b>     | <b>0.16</b>  | <b>-0.06</b> | <b>-0.01</b> | <b>0.00</b>  | –            | –                            |
|                                    |           | $\max \Delta G_y x$        | 0.09            | 0.10         | 0.10         | 0.09         | 0.09         | –            | 0.10                         |
|                                    |           | $\text{ave } \Delta G_y x$ | 0.05            | 0.05         | 0.04         | 0.04         | 0.04         | –            | 0.04                         |

$a$ : All  $\Delta G_y$  are in eV.

$b$ : Null hypothesis, in which deviations are relative to the average as opposed to linear regression.

**Table S.8E.** Quality of linear relations between micro-solvated  $\text{OH}_x$  ( $x = 1,2$ ) energies on different metals.

|                          | Metal $y$ | Statistics <sup>a</sup> | $\overline{CN}$ | Ag          | Au          | Ir          | Pd          | <i>no trend</i> <sup>b</sup> |
|--------------------------|-----------|-------------------------|-----------------|-------------|-------------|-------------|-------------|------------------------------|
| $\text{H}_2\text{O}, MS$ | Ag        | $R$                     | <b>0.22</b>     | –           | <b>0.78</b> | <b>0.92</b> | <b>0.96</b> | –                            |
|                          |           | $\max \Delta G_y x$     | 0.12            | –           | 0.08        | 0.05        | 0.04        | 0.13                         |
|                          | Au        | $R$                     | <b>0.48</b>     | <b>0.78</b> | –           | <b>0.86</b> | <b>0.95</b> | –                            |
|                          |           | $\max \Delta G_y x$     | 0.14            | 0.11        | –           | 0.10        | 0.11        | 0.17                         |
|                          | Ir        | $R$                     | <b>0.48</b>     | <b>0.92</b> | <b>0.86</b> | –           | <b>0.95</b> | –                            |
|                          |           | $\max \Delta G_y x$     | 0.33            | 0.19        | 0.23        | –           | 0.15        | 0.53                         |
|                          | Pd        | $R$                     | <b>0.26</b>     | <b>0.96</b> | <b>0.83</b> | <b>0.95</b> | –           | –                            |
|                          |           | $\max \Delta G_y x$     | 0.19            | 0.08        | 0.14        | 0.08        | –           | 0.20                         |
| $\text{OH}, MS$          | Ag        | $R$                     | <b>0.82</b>     | –           | <b>0.98</b> | <b>0.96</b> | <b>0.90</b> | –                            |
|                          |           | $\max \Delta G_y x$     | 0.18            | –           | 0.08        | 0.10        | 0.16        | 0.40                         |
|                          | Au        | $R$                     | <b>0.89</b>     | <b>0.98</b> | –           | <b>0.96</b> | <b>0.91</b> | –                            |
|                          |           | $\max \Delta G_y x$     | 0.18            | 0.08        | –           | 0.12        | 0.19        | 0.47                         |
|                          | Ir        | $R$                     | <b>0.85</b>     | <b>0.96</b> | <b>0.96</b> | –           | <b>0.97</b> | –                            |
|                          |           | $\max \Delta G_y x$     | 0.35            | 0.27        | 0.22        | –           | 0.19        | 0.95                         |
|                          | Pd        | $R$                     | <b>0.75</b>     | <b>0.90</b> | <b>0.91</b> | <b>0.97</b> | –           | –                            |
|                          |           | $\max \Delta G_y x$     | 0.20            | 0.21        | 0.19        | 0.09        | –           | 0.42                         |

$a$ : All  $\Delta G_y$  are in eV.

$b$ : Null hypothesis, in which deviations are relative to the average as opposed to linear regression.



### S.9. Water bilayer on Au(111)

We computed the solvation of \*OH within a water bilayer on Au(111) that appears in Table 1 in the main text using a  $\sqrt{3}\times\sqrt{3}$  R30° (111) supercell. In it, the adsorption energies of atop \*OH in vacuum and surrounded by water are 1.65 and 0.97 eV, such that  $\Omega_{OH} = -0.68$  eV. The ZPE and TS (at T = 298.15 K) of \*OH are 0.32 and 0.17 eV in vacuum, and 1.02 and 0.25 eV withing the half-dissociated water bilayer. In turn, the ZPE and TS of the full water bilayer are 1.31 and 0.32 eV.

### References

- (1) Calle-Vallejo, F.; F. de Morais, R.; Illas, F.; Loffreda, D.; Sautet, P. Affordable Estimation of Solvation Contributions to the Adsorption Energies of Oxygenates on Metal Nanoparticles. *J. Phys. Chem. C* **2019**, *123* (9), 5578–5582. <https://doi.org/10.1021/acs.jpcc.9b01211>.
- (2) Kresse, G.; Furthmüller, J. Efficiency of Ab-Initio Total Energy Calculations for Metals and Semiconductors Using a Plane-Wave Basis Set. *Comput. Mater. Sci.* **1996**, *6* (1), 15–50. [https://doi.org/10.1016/0927-0256\(96\)00008-0](https://doi.org/10.1016/0927-0256(96)00008-0).
- (3) Kresse, G.; Furthmüller, J. Efficient Iterative Schemes for Ab Initio Total-Energy Calculations Using a Plane-Wave Basis Set. *Phys. Rev. B* **1996**, *54* (16), 11169–11186. <https://doi.org/10.1103/PhysRevB.54.11169>.
- (4) Kresse, G.; Hafner, J. Ab Initio Molecular Dynamics for Liquid Metals. *Phys. Rev. B* **1993**, *47* (1), 558–561. <https://doi.org/10.1103/PhysRevB.47.558>.
- (5) Kresse, G.; Hafner, J. Ab Initio Molecular-Dynamics Simulation of the Liquid-Metal--Amorphous-Semiconductor Transition in Germanium. *Phys. Rev. B* **1994**, *49* (20), 14251–14269. <https://doi.org/10.1103/PhysRevB.49.14251>.
- (6) Methfessel, M.; Paxton, A. T. High-Precision Sampling for Brillouin-Zone Integration in Metals. *Phys. Rev. B* **1989**, *40* (6), 3616–3621. <https://doi.org/10.1103/PhysRevB.40.3616>.
- (7) Nørskov, J. K.; Rossmeisl, J.; Logadottir, A.; Lindqvist, L.; Kitchin, J. R.; Bligaard, T.; Jónsson, H. Origin of the Overpotential for Oxygen Reduction at a Fuel-Cell Cathode. *J. Phys. Chem. B* **2004**, *108* (46), 17886–17892. <https://doi.org/10.1021/jp047349j>.
- (8) Lide, D. R. *CRC Handbook of Chemistry and Physics*, 84<sup>th</sup> ed.; CRC Press, 2003.
- (9) Shampine, L. F. Matlab Program for Quadrature in 2D. *Appl. Math. Comput.* **2008**, *202* (1), 266–274. <https://doi.org/10.1016/j.amc.2008.02.012>.
